# Supplementary material for: Dietary antioxidant consumption and the risk of type 2 diabetes in South Korean adults: a prospective cohort study based on the Health Examinees study
Source: PubMed Central journal article supplement — BMJ Open. 2022 Jul 12;12(7):e065073. doi: 10.1136/bmjopen-2022-065073 (PMC9277397; doi:10.1136/bmjopen-2022-065073), 2022-07-12
Supplement: bmjopen-2022-065073.draft_revisions.pdf [file bmjopen-2022-065073.draft_revisions.pdf]

# BMJ Open

BMJ Open is committed to open peer review. As part of this commitment we make the peer review history of every article we publish publicly available.

When an article is published we post the peer reviewers' comments and the authors' responses online. We also post the versions of the paper that were used during peer review. These are the versions that the peer review comments apply to.

The versions of the paper that follow are the versions that were submitted during the peer review process. They are not the versions of record or the final published versions. They should not be cited or distributed as the published version of this manuscript.

BMJ Open is an open access journal and the full, final, typeset and author-corrected version of record of the manuscript is available on our site with no access controls, subscription charges or pay-per-view fees (<http://bmjopen.bmj.com>).

If you have any questions on BMJ Open's open peer review process please email [info.bmjopen@bmj.com](mailto:info.bmjopen@bmj.com)

# BMJ Open

## Dietary antioxidant consumption and the risk of type 2 diabetes in South Korean adults: A prospective cohort study based on the Health Examinees study

|                               |                                                                                                                                                                                                                                                                                                                                                                                                                                                           |
|-------------------------------|-----------------------------------------------------------------------------------------------------------------------------------------------------------------------------------------------------------------------------------------------------------------------------------------------------------------------------------------------------------------------------------------------------------------------------------------------------------|
| Journal:                      | <i>BMJ Open</i>                                                                                                                                                                                                                                                                                                                                                                                                                                           |
| Manuscript ID                 | bmjopen-2022-065073                                                                                                                                                                                                                                                                                                                                                                                                                                       |
| Article Type:                 | Original research                                                                                                                                                                                                                                                                                                                                                                                                                                         |
| Date Submitted by the Author: | 27-May-2022                                                                                                                                                                                                                                                                                                                                                                                                                                               |
| Complete List of Authors:     | TAN, LIJUAN; Chung Ang University - Anseong Campus, Department of Food and Nutrition<br>Hwang, Su Bin; Chung-Ang University, Department of Food and Nutrition<br>Jun, Shinyoung; Graduate School of Cancer Science and Policy, Department of Cancer Biomedical Science<br>Joung, Hyojee; Seoul National University, Department of Public Health, Graduate School of Public Health<br>Shin, Sangah; Chung-Ang University, Department of Food and Nutrition |
| Keywords:                     | DIABETES & ENDOCRINOLOGY, EPIDEMIOLOGY, NUTRITION & DIETETICS, PUBLIC HEALTH, STATISTICS & RESEARCH METHODS                                                                                                                                                                                                                                                                                                                                               |
|                               |                                                                                                                                                                                                                                                                                                                                                                                                                                                           |

SCHOLARONE™  
Manuscripts

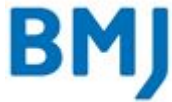

I, the Submitting Author has the right to grant and does grant on behalf of all authors of the Work (as defined in the below author licence), an exclusive licence and/or a non-exclusive licence for contributions from authors who are: i) UK Crown employees; ii) where BMJ has agreed a CC-BY licence shall apply, and/or iii) in accordance with the terms applicable for US Federal Government officers or employees acting as part of their official duties; on a worldwide, perpetual, irrevocable, royalty-free basis to BMJ Publishing Group Ltd ("BMJ") its licensees and where the relevant Journal is co-owned by BMJ to the co-owners of the Journal, to publish the Work in this journal and any other BMJ products and to exploit all rights, as set out in our [licence](#).

The Submitting Author accepts and understands that any supply made under these terms is made by BMJ to the Submitting Author unless you are acting as an employee on behalf of your employer or a postgraduate student of an affiliated institution which is paying any applicable article publishing charge ("APC") for Open Access articles. Where the Submitting Author wishes to make the Work available on an Open Access basis (and intends to pay the relevant APC), the terms of reuse of such Open Access shall be governed by a Creative Commons licence – details of these licences and which [Creative Commons](#) licence will apply to this Work are set out in our licence referred to above.

Other than as permitted in any relevant BMJ Author's Self Archiving Policies, I confirm this Work has not been accepted for publication elsewhere, is not being considered for publication elsewhere and does not duplicate material already published. I confirm all authors consent to publication of this Work and authorise the granting of this licence.

1 **Dietary antioxidant consumption and the risk of type 2 diabetes in South Korean adults:**  
2  
3  
4  
5 **A prospective cohort study based on the Health Examinees study**  
6  
7

8  
9 Li-Juan Tan <sup>1\*</sup>, Su Bin Hwang <sup>1\*</sup>, Shinyoung Jun <sup>2</sup>, Hyojee Joung <sup>3</sup>, Sangah Shin<sup>1§</sup>  
10  
11

12 <sup>1</sup> Department of Food and Nutrition, Chung-Ang University, Gyeonggi-do 17546, South  
13  
14 Korea  
15

16  
17  
18 <sup>2</sup> Department of Cancer Biomedical Science, Graduate School of Cancer Science and Policy,  
19  
20 Goyang 10408, South Korea  
21  
22

23  
24 <sup>3</sup> Department of Public Health, Graduate School of Public Health, Seoul National University,  
25  
26 Seoul 08826, South Korea  
27  
28

29  
30 \*Co-first authors: These authors contributed equally to this work  
31

32  
33 §Correspondence: Sangah Shin, Department of Food and Nutrition, Chung-Ang University,  
34  
35 Gyeonggi-do 17546, South Korea. E-mail: ivory8320@cau.ac.kr; Tel.: +82-31-670-3259;  
36  
37 Fax: +82-31-675-1381  
38  
39

40  
41 **ORCID*s***  
42

43  
44  
45 Li-Juan Tan: <https://orcid.org/0000-0002-8970-0884>  
46

47  
48 Su Bin Hwang: <https://orcid.org/0000-0001-7266-3530>  
49

50  
51 Shinyoung Jun: <https://orcid.org/0000-0003-2452-4709>  
52

53  
54 Hyojee Joung: <https://orcid.org/0000-0003-1182-7786>  
55

56  
57 Sangah Shin: <https://orcid.org/0000-0003-0094-1014>  
58  
59  
60

1  
2  
3 20 **Word count:** 3,342 words  
4  
5

6 21 **ABSTRACT**  
7  
8  
9

10 22 **Objectives:** Antioxidants are common dietary compounds with multiple health benefits.  
11  
12 23 This study aimed to identify the association between dietary antioxidant consumption and  
13  
14 24 the incidence of type 2 diabetes mellitus (T2D, defined using the Korean Diabetes  
15  
16 25 Association criteria) in South Korean adults.

17  
18  
19 26 **Design:** Baseline and follow-up data from the Health Examinees (HEXA) study, a large-  
20  
21 27 scale community-based genomic cohort study conducted in South Korea  
22

23 28 **Setting:** A South Korean community  
24

25  
26 29 **Participants:** A total of 20,594 participants, aged 40–79 years, who participated in the  
27  
28 30 baseline and follow-up surveys of the HEXA study were included. After an average of 5  
29  
30 31 years of follow-up, there were 332 men and 360 women with T2D.  
31

32 32 **Results:** Participants with the highest total flavonoid consumption (Q5) had a lower risk of  
33  
34 33 T2D (men: hazard ratio [HR], 0.63; 95% confidence interval [CI], 0.42–0.93; *P* for trend =  
35  
36 34 0.0169]; and women: HR, 0.54; 95% CI, 0.438–0.78; *P* for trend = 0.0001) than those with  
37  
38 35 the lowest consumption (Q1). Dietary total antioxidant capacity was significantly inversely  
39  
40 36 associated with the development of T2D mellitus in women participants alone (HR, 0.58;  
41  
42 37 95% CI, 0.40–0.83; *P* for trend = 0.0004). Stratified analyses according to age and body  
43  
44 38 mass index showed that dietary total flavonoid consumption and total antioxidant capacity  
45  
46 39 had a protective effect against the development of T2D in women aged > 52 years and  
47  
48 40 women with BMI > 25 kg/m<sup>2</sup>.  
49  
50  
51  
52

53 41 **Conclusions:** Dietary flavonoid consumption and total antioxidant capacity were associated  
54  
55 42 with a lower risk of T2D in South Korean adults, especially in women aged > 52 years and  
56  
57  
58  
59  
60

1  
2  
3 43 overweight. The findings of this study may provide reference data for the modification of  
4  
5 44 dietary guidelines for South Koreans.  
6  
7  
8

9 **45 Strengths and limitations of the study**

- 10  
11  
12 46 • This study used a large-scale community-based genomic cohort study conducted in  
13  
14 South Korea with 5 years of follow-up.  
15  
16  
17 48 • Stratified analyses were conducted to focus on one certain exposure.  
18  
19 49 • Although this study reported a longitudinal relationship between antioxidant  
20  
21 consumption and diabetes incidence, we could not assess the causality.  
22  
23  
24 51 • Dietary measurement errors were inevitable due to using self-reported FFQ.  
25  
26

27 **52 Keywords:** Cohort study, Diabetes, Dietary antioxidant, Flavonoid, Health Examinees  
28  
29 53 study, South Korean adults, Total antioxidant capacity  
30  
31  
32  
33  
34  
35  
36  
37  
38  
39  
40  
41  
42  
43  
44  
45  
46  
47  
48  
49  
50  
51  
52  
53  
54  
55  
56  
57  
58  
59  
60

## 54 INTRODUCTION

55 Diabetes is a metabolic disease characterized by high blood glucose levels, impaired  
56 glucose tolerance, impaired insulin secretion, and insulin resistance.(1, 2) Currently,  $\geq 400$   
57 million people are living with type 2 diabetes (T2D) mellitus worldwide.(3) The prevalence  
58 of T2D mellitus increases with age. The 2018 Korean Diabetes Association diabetes fact  
59 sheet reported that the prevalence of T2D in the total population aged  $\geq 65$  years was  
60 29.8%.(4) It is projected that T2D will be the seventh leading cause of death by 2030.(3)  
61 Given that T2D is accompanied by various serious complications, including cardiovascular  
62 disease, peripheral vascular disease, retinopathy, nephropathy, neuropathy, and recently,  
63 sarcopenia, its prevention and treatment are extremely important.(3, 5) Both genetic and  
64 environmental factors contribute to the development and progression of T2D mellitus.  
65 However, its growing prevalence is the result of result of changing dietary habits and  
66 lifestyles observed in modern societies.(6)

67 Dietary flavonoids, abundant in fruits and vegetables, are a group of naturally occurring  
68 polyphenolic compounds.(7, 8) There are seven subgroups of flavonoids: flavonols,  
69 flavanones, isoflavones, flavones, flavan-3-ols, anthocyanins, and proanthocyanidins.(9-11)  
70 Flavonoids are associated with various health-promoting effects, including anti-  
71 inflammatory, antihypertensive, anti-obesity, and anti-diabetic.

72 Previous studies have reported that dietary antioxidants decreased oxidative stress, an  
73 important risk factor for T2D, played a key role as anti-inflammatory factors by blocking  
74 the nuclear factor kappa-light-chain-enhancer of the activated B (NF- $\kappa$ B) and mitogen-  
75 activated protein kinase (MAPK) cell signaling pathways. MAPK pathway was associated  
76 with the induction of proinflammatory genes and the promotion of Akt/protein kinase B, an  
77 insulin-signaling pathway.(12-15) As a result, antioxidants improve insulin resistance,

1  
2  
3 78 which is involved in the pathogenesis of T2D mellitus, by promoting the transportation of  
4  
5 79 GLUT4 through the regulation of the insulin-signaling pathway.(16, 17)  
6  
7

8 80 Previous studies have investigated the correlation between dietary antioxidants and  
9  
10 81 obesity, dyslipidemia, and metabolic syndrome.(18-21) Azad et al. (22) showed that a diet  
11  
12 82 high in antioxidants had protective effects against the development of T2D in the Iranian  
13  
14 83 population. However, few studies have been conducted to determine the association between  
15  
16 84 dietary antioxidant intake and T2D in South Korean populations. In addition, whether there  
17  
18 85 is a dose-response relationship between dietary antioxidants and T2D is unclear. It is  
19  
20 86 pertinent to determine whether a relationship exists between dietary antioxidant intake and  
21  
22 87 T2D in South Korean adults. Moreover, the effect of dietary antioxidants on T2D has not  
23  
24 88 been investigated according to the flavonoid subclasses, antioxidant capacities of flavonoids,  
25  
26 89 or total antioxidant capacity (TAC), which is an index to indicate whole dietary antioxidant  
27  
28 90 content.(23) Therefore, we conducted this study to explore the association between dietary  
29  
30 91 antioxidant and the incidence of T2D by analyzing data from the Health Examinees (HEXA)  
31  
32 92 study.  
33  
34  
35  
36  
37  
38  
39  
40  
41

## 42 94 **METHODS**

### 43 44 45 95 **Patient and public involvement**

46  
47  
48 96 Patients and public were not involved in the design of the study.  
49  
50

### 51 97 **Study population**

52  
53  
54 98 This study was based on the baseline and follow-up data from the HEXA study, a large-  
55  
56 99 scale community-based genomic cohort study conducted in South Korea. More specific  
57  
58 100 details of the HEXA study design are described elsewhere.(24) A total of 173,357  
59  
60



1  
2  
3 101 participants aged  $\geq 40$  years were initially included in the baseline survey, which was  
4  
5 102 conducted from 2003 to 2014; 65,642 of these participants were included in the follow-up  
6  
7 103 survey, which was conducted from 2012 to 2016. At baseline, we excluded participants who  
8  
9 104 had T2D mellitus or had no information on fasting plasma glucose or HbA<sub>1C</sub> levels (n =  
10  
11 105 41,311) and those with a history of diseases closely related to T2D mellitus (i.e.,  
12  
13 106 hyperlipidemia, stroke, transient ischemic attacks, angina pectoris, and myocardial  
14  
15 107 infarction) (n = 3,082). At follow-up, we excluded those with missing information on  
16  
17 108 biomarkers for T2D mellitus (fasting plasma glucose, HbA<sub>1C</sub>) (n = 11), those who had an  
18  
19 109 implausible energy intake ( $< 3,349$  or  $\geq 16,743$  kJ/day for men and  $< 2,093$  or  $\geq 14,650$   
20  
21 110 kJ/day for women; n = 630 (25)), and those who were missing values for covariables such  
22  
23 111 as drinking (n = 9) and body mass index (BMI) (n = 5). Ultimately, a total of 20,594  
24  
25 112 participants (6,327 men and 14,267 women) were included in this study.  
26  
27  
28  
29  
30

### 31 **Dietary assessment and estimation of antioxidant components**

32  
33  
34 114 Dietary intake was assessed using the self-administered, 106-item, food frequency  
35  
36 115 questionnaire (FFQ) developed for the Korean Genome Epidemiologic Study.(24)  
37  
38 116 Participants reported the frequencies and average portions of food or beverage items  
39  
40 117 consumed during the last year before participating in the HEXA study. The reproducibility  
41  
42 118 and validity of the FFQ have been assessed in a previous study using a reference method by  
43  
44 119 collecting information on 12-day dietary records.(26) The median correlation coefficient for  
45  
46 120 all nutrients was 0.39 between the FFQ and 12-day dietary record, and the researchers  
47  
48 121 concluded that the FFQ could be an acceptable tool for dietary assessment.(26)  
49  
50  
51  
52

53 122 In this study, we estimated the participants' intake of antioxidant components using  
54  
55 123 self-reported dietary data linked to the TAC database for common South Korean foods.(11,  
56  
57 124 27) Dietary TAC and intake of each flavonoid component were expressed as vitamin C  
58  
59  
60

1  
2  
3 125 equivalent antioxidant capacity (mg VCE/100 g). The intake of individual antioxidant  
4  
5 126 components from a food item was calculated by multiplying the antioxidant component per  
6  
7 127 gram of food item by the total weight in grams of daily intake of this food item. The daily  
8  
9 128 intake of individual total dietary antioxidant components was calculated as the sum of the  
10  
11 129 intake of each antioxidant component from all the food sources reported in the HEXA FFQ  
12  
13 130 data (mg VCE/day). After summing all individual total dietary antioxidant components, we  
14  
15 131 obtained the dietary TAC per person per day.

16  
17  
18  
19  
20 132 Total flavonoid intake was classified into seven categories: anthocyanidins (cyanidin,  
21  
22 133 delphinidin, pelargonidin, malvidin, peonidin, and petunidin), isoflavones (daidzein,  
23  
24 134 genistein, and glycitein), proanthocyanidins (proanthocyanidin-dimer, proanthocyanidin-  
25  
26 135 trimer, proanthocyanidin-4-6mers, proanthocyanidin-7-10mers, and proanthocyanidin-  
27  
28 136 polymers), flavonols (quercetin, kaempferol, myricetin, and isorhamnetin), flavones  
29  
30 137 (luteolin and apigenin), flavanones (eriodictyol, hesperetin, and naringenin), and flavan-3-  
31  
32 138 ols (catechin, epicatechin, epigallocatechin, theaflavin, theaflavin-3-gallate, theaflavin-3'-  
33  
34 139 gallate, and theaflavin-3-3-digallate).

## 35 36 37 38 39 140 **Definition of type 2 diabetes**

40  
41  
42 141 T2D was determined in accordance with the definition provided by the Korean Diabetes  
43  
44 142 Association.(28) T2D was defined as a diagnosis by a physician, increased fasting plasma  
45  
46 143 glucose level  $\geq 6.99$  mmol/L (126 mg/dL), or elevated HbA<sub>1C</sub> level  $\geq 47.5$  mmol/mol (6.5%).  
47  
48

## 49 144 **Covariables**

50  
51  
52 145 In the HEXA study, the sociodemographic information of each participant was  
53  
54 146 collected using a questionnaire. Our covariables of interest included age, BMI, level of  
55  
56 147 education (middle school or lower, high school, or college or higher), and health-related  
57  
58  
59  
60

1  
2  
3 148 behaviors, such as smoking (current smoker, past smoker, or non-smoker), alcohol  
4  
5 149 consumption (never or current drinker), level of physical activity (inactive or active), and  
6  
7  
8 150 total energy intake (kJ/day). BMI was calculated as the quotient of the body weight (kg) and  
9  
10 151 height (m) squared (kg/m<sup>2</sup>).<sup>(29)</sup> Smoking status was categorized into three groups based on  
11  
12 152 the participants' responses to the question, "Have you smoked  $\geq$  20 packs (400 cigarettes)  
13  
14 153 so far?" Participants who answered "never" were classified as "non-smokers," those who  
15  
16 154 answered "yes" and were still smoking at the time of the survey were classified as "current  
17  
18 155 smokers," and those who answered "yes" but had quit smoking at the time of the survey  
19  
20 156 were classified as "past smokers." Alcohol consumption was classified based on the  
21  
22 157 responses to the following question, "Are you unable to drink or refuse to do so for religious  
23  
24 158 or other reasons?" in the HEXA survey. In the present analysis, we classified participants  
25  
26 159 who replied "yes" as "alcohol non-drinkers;" the rest were classified as "alcohol drinkers."  
27  
28 160 Regarding physical activity levels, participants were classified as "active" if they reported  
29  
30 161 that they engaged in exercises resulting in sweating for  $\geq$  30 min twice a week.<sup>(30)</sup>  
31  
32  
33  
34  
35

### 36 162 **Statistical analyses**

37  
38  
39 163 All statistical analyses were sex-stratified and performed using Statistical Analysis  
40  
41 164 Systems software version 9.4 (SAS Institute, Cary, NC, USA). Statistical significance was  
42  
43 165 set at  $P < 0.05$ . Continuous variables were presented as means  $\pm$  standard deviations (SD),  
44  
45 166 and the difference between them in the outcome groups was tested using a generalized linear  
46  
47 167 model (GLM). The categorical variables were presented as numbers (percentages), and the  
48  
49 168 difference between them in the outcome groups was tested using the chi-square test. A  
50  
51 169 multivariable Cox proportional-hazards regression model was used to estimate the hazard  
52  
53 170 ratios (HRs) and 95% confidence intervals (CIs) for T2D after adjusting for categorical  
54  
55 171 (educational level, current drinking status, current smoking status, and physical activity) and  
56  
57  
58  
59  
60

172 continuous (age, BMI, and energy intake) covariables. The lowest quintile (Q1) of TAC or  
 173 flavonoid intake served as a reference group. The median value of each quintile group was  
 174 modeled as a continuous variable in the Cox model to test the trend. We also estimated the  
 175 HRs and 95% CIs for an SD increment in dietary TAC and flavonoid intake and conducted  
 176 stratified analyses according to BMI, age, smoking status, and alcohol consumption.

177 **RESULTS**

178 A total of 20,594 individuals (aged 40–79 years) were included in this study. After an  
 179 average of 5 years of follow-up, the incidence of T2D mellitus was 5.25% in men and 2.52%  
 180 in women. The baseline general characteristics of participants according to quintiles of total  
 181 flavonoid intake are shown in Table 1. Among both men and women participants, the highest  
 182 consumption group (Q5) included more non-smokers, more participants with higher  
 183 education levels, and more participants who engaged in physical activity (all *p* value < 0.05).

184 Table 1. Baseline general characteristics of participants by total flavonoid consumption

|                               | Antioxidant consumption |                     |                     |                     |                     | <i>P</i> -value |
|-------------------------------|-------------------------|---------------------|---------------------|---------------------|---------------------|-----------------|
|                               | Q1                      | Q2                  | Q3                  | Q4                  | Q5                  |                 |
| <b>Men, n=6327</b>            |                         |                     |                     |                     |                     |                 |
| <b>Cases / person-years</b>   | <b>80 / 5103.00</b>     | <b>74 / 5060.60</b> | <b>60 / 4995.40</b> | <b>71 / 5110.50</b> | <b>47 / 5182.60</b> |                 |
| Age, years                    | 54.45 ± 8.64            | 54.97 ± 8.51        | 54.20 ± 8.37        | 54.55 ± 8.32        | 54.89 ± 7.97        | 0.0758          |
| BMI, kg/m <sup>2</sup>        | 24.07 ± 2.74            | 24.19 ± 2.73        | 24.21 ± 2.71        | 24.31 ± 2.65        | 24.32 ± 2.58        | 0.1348          |
| Smoking status                |                         |                     |                     |                     |                     | <.0001          |
| Never                         | 357 (28.22%)            | 404 (31.91%)        | 395 (31.27%)        | 373 (29.56%)        | 426 (33.84%)        |                 |
| Past                          | 451 (35.65%)            | 516 (40.76%)        | 549 (43.47%)        | 586 (46.43%)        | 575 (45.67%)        |                 |
| Current                       | 457 (36.13%)            | 346 (27.33%)        | 319 (25.26%)        | 303 (24.01%)        | 258 (20.49%)        |                 |
| Educational level             |                         |                     |                     |                     |                     | <.0001          |
| Under middle school           | 382 (30.32%)            | 297 (23.52%)        | 244 (19.40%)        | 186 (14.77%)        | 135 (10.69%)        |                 |
| High school                   | 503 (39.92%)            | 521 (41.25%)        | 492 (39.11%)        | 504 (40.03%)        | 422 (33.41%)        |                 |
| College or above              | 375 (29.76%)            | 445 (35.23%)        | 522 (41.49%)        | 569 (45.19%)        | 706 (55.90%)        |                 |
| Physical activity             |                         |                     |                     |                     |                     | <.0001          |
| Inactive                      | 1070 (84.65%)           | 1024 (80.95%)       | 999 (79.03%)        | 976 (77.28%)        | 896 (70.94%)        |                 |
| Active                        | 194 (15.35%)            | 241 (19.05%)        | 265 (20.97%)        | 287 (22.72%)        | 367 (29.06%)        |                 |
| Current alcohol consumption   |                         |                     |                     |                     |                     | 0.2578          |
| No                            | 313 (24.74%)            | 337 (26.62%)        | 342 (27.04%)        | 340 (26.86%)        | 364 (28.77%)        |                 |
| Yes                           | 952 (75.26%)            | 929 (73.38%)        | 923 (72.96%)        | 926 (73.14%)        | 901 (71.23%)        |                 |
| Total energy intake, kcal/day | 1624.56 ± 401.00        | 1764.89 ± 417.55    | 1842.23 ± 431.57    | 1926.29 ± 442.88    | 2110.85 ± 499.16    | <.0001          |
| Carbohydrate, E%              | 72.51 ± 7.71            | 71.63 ± 7.10        | 71.00 ± 7.33        | 70.49 ± 6.88        | 70.07 ± 7.09        | <.0001          |
| Protein, E%                   | 12.99 ± 2.41            | 13.33 ± 2.12        | 13.52 ± 2.25        | 13.79 ± 2.26        | 13.97 ± 2.37        | <.0001          |
| Fat, E%                       | 14.50 ± 5.73            | 15.04 ± 5.33        | 15.47 ± 5.48        | 15.73 ± 5.07        | 15.96 ± 5.15        | <.0001          |
| Dietary fiber intake, g/day   | 3.84 ± 1.12             | 4.72 ± 1.24         | 5.28 ± 1.33         | 5.91 ± 1.50         | 7.42 ± 2.14         | <.0001          |
| Total flavonoid, mg VCE/d     | 58.16 ± 15.38           | 97.92 ± 10.58       | 135.76 ± 11.78      | 185.20 ± 18.17      | 299.44 ± 77.77      | <.0001          |
| Anthocyanidins, mg VCE/d      | 11.73 ± 5.14            | 20.53 ± 6.74        | 28.17 ± 9.84        | 37.83 ± 13.24       | 62.90 ± 28.55       | <.0001          |
| Isoflavones, mg VCE/d         | 8.63 ± 4.74             | 11.56 ± 6.30        | 12.24 ± 6.53        | 13.16 ± 6.86        | 15.96 ± 9.48        | <.0001          |
| Proanthocyanidins, mg VCE/d   | 23.59 ± 9.01            | 41.24 ± 10.74       | 59.17 ± 14.68       | 80.74 ± 21.27       | 135.10 ± 47.83      | <.0001          |
| Flavonols, mg VCE/d           | 7.50 ± 4.38             | 10.58 ± 6.08        | 13.18 ± 6.82        | 16.78 ± 9.23        | 24.31 ± 16.28       | <.0001          |
| Flavones, mg VCE/d            | 0.29 ± 0.15             | 0.45 ± 0.18         | 0.60 ± 0.22         | 0.79 ± 0.29         | 1.19 ± 0.49         | <.0001          |
| Flavanones, mg VCE/d          | 1.80 ± 1.52             | 3.20 ± 1.96         | 4.56 ± 2.74         | 6.01 ± 3.76         | 10.29 ± 6.33        | <.0001          |
| Flavan-3-ols, mg VCE/d        | 4.63 ± 4.40             | 10.35 ± 9.70        | 17.84 ± 15.94       | 29.88 ± 23.91       | 49.69 ± 37.80       | <.0001          |
| TAC, mg VCE/d                 | 113.96 ± 32.02          | 185.25 ± 30.65      | 252.44 ± 37.18      | 343.26 ± 51.65      | 542.84 ± 149.10     | <.0001          |
| <b>Women, n=14267</b>         |                         |                     |                     |                     |                     |                 |

|                               |                      |                      |                      |                      |                      |                  |
|-------------------------------|----------------------|----------------------|----------------------|----------------------|----------------------|------------------|
| <b>Cases / person-years</b>   | <b>89 / 11021.20</b> | <b>82 / 11303.30</b> | <b>76 / 11322.20</b> | <b>59 / 11526.80</b> | <b>54 / 11650.80</b> |                  |
| Age, years                    | 52.64 ± 8.04         | 52.31 ± 7.84         | 52.19 ± 7.68         | 52.01 ± 7.23         | 52.18 ± 7.02         | 0.0832           |
| BMI, kg/m <sup>2</sup>        | 23.44 ± 3.05         | 23.40 ± 2.93         | 23.32 ± 2.85         | 23.27 ± 2.80         | 23.19 ± 2.72         | 0.8879           |
| Smoking status                |                      |                      |                      |                      |                      | <b>&lt;.0001</b> |
| Never                         | 2746 (96.32%)        | 2784 (97.72%)        | 2788 (97.82%)        | 2806 (98.39%)        | 2768 (97.23%)        |                  |
| Past                          | 31 (1.09%)           | 21 (0.74%)           | 24 (0.84%)           | 21 (0.74%)           | 35 (1.23%)           |                  |
| Current                       | 74 (2.60%)           | 44 (1.54%)           | 38 (1.33%)           | 25 (0.88%)           | 44 (1.55%)           |                  |
| Educational level             |                      |                      |                      |                      |                      | <b>&lt;.0001</b> |
| Under middle school           | 1150 (40.41%)        | 977 (34.33%)         | 901 (31.74%)         | 760 (26.73%)         | 625 (22.01%)         |                  |
| High school                   | 1236 (43.43%)        | 1305 (45.85%)        | 1297 (45.69%)        | 1368 (48.12%)        | 1341 (47.23%)        |                  |
| College or above              | 460 (16.16%)         | 564 (19.82%)         | 641 (22.58%)         | 715 (25.15%)         | 873 (30.75%)         |                  |
| Physical activity             |                      |                      |                      |                      |                      | <b>&lt;.0001</b> |
| Inactive                      | 2449 (85.96%)        | 2355 (82.63%)        | 2294 (80.46%)        | 2239 (78.48%)        | 2120 (74.49%)        |                  |
| Active                        | 400 (14.04%)         | 495 (17.37%)         | 557 (19.54%)         | 614 (21.52%)         | 726 (25.51%)         |                  |
| Current alcohol consumption   |                      |                      |                      |                      |                      | 0.2756           |
| No                            | 1900 (66.60%)        | 1967 (68.92%)        | 1932 (67.72%)        | 1928 (67.55%)        | 1966 (68.91%)        |                  |
| Yes                           | 953 (33.40%)         | 887 (31.08%)         | 921 (32.28%)         | 926 (32.45%)         | 887 (31.09%)         |                  |
| Total energy intake, kcal/day | 1429.83 ± 392.78     | 1577.31 ± 420.56     | 1659.22 ± 437.45     | 1761.14 ± 460.69     | 1947.92 ± 497.29     | <b>&lt;.0001</b> |
| Carbohydrate, E%              | 71.87 ± 8.06         | 71.25 ± 7.93         | 70.67 ± 7.63         | 70.30 ± 7.36         | 69.97 ± 7.30         | <b>&lt;.0001</b> |
| Protein, E%                   | 13.39 ± 2.47         | 13.59 ± 2.42         | 13.76 ± 2.38         | 13.89 ± 2.33         | 14.01 ± 2.43         | <b>&lt;.0001</b> |
| Fat, E%                       | 14.74 ± 6.03         | 15.16 ± 5.91         | 15.57 ± 5.65         | 15.81 ± 5.45         | 16.02 ± 5.33         | <b>&lt;.0001</b> |
| Dietary fiber intake, g/day   | 3.80 ± 1.11          | 4.61 ± 1.21          | 5.13 ± 1.30          | 5.97 ± 1.52          | 7.38 ± 2.10          | <b>&lt;.0001</b> |
| Total flavonoid, mg VCE/d     | 71.44 ± 17.73        | 116.97 ± 11.49       | 159.39 ± 13.42       | 213.52 ± 19.24       | 333.98 ± 94.24       | <b>&lt;.0001</b> |
| Anthocyanidins, mg VCE/d      | 15.24 ± 6.21         | 25.89 ± 8.12         | 35.35 ± 11.02        | 46.82 ± 14.12        | 74.77 ± 32.62        | <b>&lt;.0001</b> |
| Isoflavones, mg VCE/d         | 8.63 ± 4.48          | 10.67 ± 5.74         | 11.70 ± 6.42         | 13.28 ± 7.25         | 15.09 ± 9.07         | <b>&lt;.0001</b> |
| Proanthocyanidins, mg VCE/d   | 31.11 ± 10.57        | 52.62 ± 11.64        | 73.61 ± 15.79        | 101.51 ± 21.34       | 161.00 ± 54.19       | <b>&lt;.0001</b> |
| Flavonols, mg VCE/d           | 8.09 ± 4.63          | 11.18 ± 5.92         | 13.54 ± 7.50         | 16.94 ± 9.30         | 24.05 ± 16.19        | <b>&lt;.0001</b> |
| Flavones, mg VCE/d            | 0.35 ± 0.18          | 0.55 ± 0.23          | 0.71 ± 0.28          | 0.89 ± 0.34          | 1.31 ± 0.62          | <b>&lt;.0001</b> |
| Flavanones, mg VCE/d          | 2.56 ± 1.91          | 4.37 ± 2.55          | 5.98 ± 3.19          | 7.70 ± 3.84          | 12.62 ± 8.04         | <b>&lt;.0001</b> |
| Flavan-3-ols, mg VCE/d        | 5.45 ± 4.85          | 11.68 ± 10           | 18.51 ± 14.74        | 26.38 ± 20.18        | 45.13 ± 36.98        | <b>&lt;.0001</b> |
| TAC (mg VCE/d)                | 135.61 ± 36.42       | 216.26 ± 31.08       | 289.3 ± 38.71        | 380.21 ± 51.07       | 587.77 ± 176.53      | <b>&lt;.0001</b> |

Values are presented as means ± standard deviations or numbers (%). *P*-values were calculated using a generalized linear model for continuous variables and Chi-square test for categorical variables. *p* < 0.05 are shown in bold.

Total flavonoid intake was the sum of anthocyanidins, isoflavones, proanthocyanidins, flavonols, flavones, flavanones, and flavan-3-ols.

Total antioxidant capacity (TAC) was obtained by combining the individual antioxidant capacity of each antioxidant derived from every food item. BMI: body mass index, VCE: vitamin C equivalents.

Table 2 shows the range of dietary antioxidant intake by quintiles. The associations between dietary antioxidant intake and the HRs of T2D mellitus are presented in Table 3. All participants with the highest total dietary flavonoid intake (Q5) had a lower risk of developing T2D mellitus (men: HR, 0.63; 95% CI, 0.42–0.93 and women: HR, 0.54; 95% CI, 0.38–0.78; both *P* for trend < 0.05) than those with the lowest flavonoid intake (Q1). Consumption of more flavonols and proanthocyanidins had a protective effect against the development of T2D mellitus in men participants, and consumption of anthocyanidins, proanthocyanidins, flavonols, flavones, and flavanones showed a protective effect against T2D mellitus in women participants (all *P* for trend < 0.05). After estimation of HRs according to quintiles of TAC, the Q5 group of women participants still showed a lower risk of T2D mellitus (HR, 0.58; 95% CI, 0.40–0.83; *P* for trend = 0.0004) than the Q1 group. However, although the TAC Q5 group of men participants did not show any significant

205 association with T2D mellitus, they had an approximately 15% reduced risk of developing  
 206 T2D mellitus for an SD increment in TAC (HR, 0.85; 95% CI, 0.75–0.96). After further  
 207 adjustment for energy percent from carbohydrate, fat, and protein and dietary fiber intake,  
 208 the results remained largely unchanged (Supplementary Table S1 and Table S2).

209 **Table 2. Range of each dietary antioxidant intake by quintile**

|                              | Antioxidant consumption |                          |                          |                          |                          |
|------------------------------|-------------------------|--------------------------|--------------------------|--------------------------|--------------------------|
|                              | Q1                      | Q2                       | Q3                       | Q4                       | Q5                       |
| <b>Men</b>                   |                         |                          |                          |                          |                          |
| Total flavonoid (mg VCE/d)   | 58.16 (13.07 – 80.30)   | 97.92 (80.32 – 116.38)   | 135.76 (116.38 – 156.75) | 185.20 (156.80 – 221.23) | 299.44 (221.46 – 378.83) |
| Anthocyanidins (mg VCE/d)    | 9.69 (0.75 – 14.14)     | 17.94 (14.14 – 21.97)    | 26.58 (21.97 – 31.57)    | 38.62 (31.57 – 46.86)    | 68.33 (46.89 – 94.05)    |
| Isoflavones (mg VCE/d)       | 5.07 (0.10 – 6.80)      | 8.07 (6.80 – 9.35)       | 10.78 (9.35 – 12.22)     | 14.16 (12.22 – 16.57)    | 23.48 (16.57 – 31.57)    |
| Proanthocyanidins (mg VCE/d) | 21.28 (1.43 – 31.14)    | 39.10 (31.15 – 47.5)     | 56.93 (47.52 – 67.33)    | 81.94 (67.35 – 99.38)    | 140.58 (99.41 – 221.23)  |
| Flavonols (mg VCE/d)         | 5.25 (0.69 – 7.30)      | 8.81 (7.30 – 10.32)      | 11.89 (10.33 – 13.65)    | 16.14 (13.65 – 19.27)    | 30.25 (19.27 – 46.86)    |
| Flavones (mg VCE/d)          | 0.23 (0.02 – 0.33)      | 0.40 (0.33 – 0.48)       | 0.57 (0.48 – 0.67)       | 0.79 (0.67 – 0.93)       | 1.32 (0.93 – 1.81)       |
| Flavanones (mg VCE/d)        | 1.03 (0.00 – 1.77)      | 2.43 (1.77 – 3.09)       | 3.93 (3.09 – 4.89)       | 6.16 (4.89 – 7.80)       | 12.33 (7.80 – 17.81)     |
| Flavan-3-ols (mg VCE/d)      | 2.98 (0.10 – 4.91)      | 6.82 (4.92 – 8.87)       | 11.79 (8.87 – 15.54)     | 23.54 (15.56 – 41.05)    | 67.26 (41.06 – 116.38)   |
| TAC (mg VCE/d)               | 111.21 (21.57 – 150.38) | 182.54 (150.45 – 215.60) | 251.21 (215.61 – 289.93) | 343.27 (289.98 – 406.09) | 549.53 (406.14 – 811.29) |
| <b>Women</b>                 |                         |                          |                          |                          |                          |
| Total flavonoid (mg VCE/d)   | 71.44 (7.28 – 96.65)    | 116.97 (96.66 – 136.81)  | 159.39 (136.81 – 183.19) | 213.52 (183.20 – 250.56) | 333.98 (250.59 – 416.37) |
| Anthocyanidins (mg VCE/d)    | 12.85 (0.44 – 18.47)    | 23.33 (18.48 – 28.19)    | 34.01 (28.19 – 40.07)    | 47.64 (40.07 – 56.64)    | 80.24 (56.65 – 116.38)   |
| Isoflavones (mg VCE/d)       | 4.83 (0.43 – 6.50)      | 7.73 (6.50 – 8.96)       | 10.31 (8.96 – 11.72)     | 13.67 (11.72 – 16.02)    | 22.83 (16.02 – 31.57)    |
| Proanthocyanidins (mg VCE/d) | 28.89 (2.21 – 41.00)    | 50.74 (41.01 – 60.82)    | 72.48 (60.83 – 84.94)    | 101.70 (84.95 – 121.70)  | 166.05 (121.73 – 221.23) |
| Flavonols (mg VCE/d)         | 5.72 (1.00 – 7.65)      | 9.09 (7.65 – 10.55)      | 12.11 (10.55 – 13.81)    | 16.26 (13.81 – 19.38)    | 30.62 (19.38 – 46.86)    |
| Flavones (mg VCE/d)          | 0.28 (0.01 – 0.39)      | 0.48 (0.39 – 0.57)       | 0.67 (0.57 – 0.77)       | 0.89 (0.77 – 1.05)       | 1.50 (1.05 – 2.04)       |
| Flavanones (mg VCE/d)        | 1.58 (0.00 – 2.58)      | 3.44 (2.58 – 4.35)       | 5.38 (4.35 – 6.55)       | 7.95 (6.55 – 9.73)       | 14.88 (9.73 – 21.78)     |
| Flavan-3-ols (mg VCE/d)      | 3.82 (0.25 – 6.06)      | 8.18 (6.06 – 10.41)      | 13.17 (10.41 – 16.31)    | 21.85 (16.31 – 30.72)    | 60.14 (30.72 – 90.85)    |
| TAC                          | 132.65 (13.04 – 178.98) | 214.39 (178.99 – 248.73) | 287.62 (248.74 – 328.90) | 380.46 (328.94 – 442.53) | 594.04 (442.54 – 811.29) |

Values were presented as mean (min–max). TAC: Total antioxidant capacity, VCE: vitamin C equivalents.

**Table 3. Hazard ratios of type 2 diabetes mellitus during follow-up according to antioxidant consumption divided into quintiles, where Q5 represents highest**

|            | Antioxidant consumption |    |    |    |    | P for trend | HR for an SD increment |
|------------|-------------------------|----|----|----|----|-------------|------------------------|
|            | Q1                      | Q2 | Q3 | Q4 | Q5 |             |                        |
| <b>Men</b> |                         |    |    |    |    |             |                        |

|                   |     |                   |                   |                   |                   |        |                   |
|-------------------|-----|-------------------|-------------------|-------------------|-------------------|--------|-------------------|
| Total flavonoid   | Ref | 0.98 (0.71, 1.34) | 0.90 (0.64, 1.26) | 0.91 (0.65, 1.27) | 0.63 (0.42, 0.93) | 0.0169 | 0.85 (0.75, 0.97) |
| Anthocyanidins    | Ref | 0.79 (0.56, 1.11) | 0.99 (0.72, 1.36) | 0.86 (0.62, 1.20) | 0.71 (0.50, 1.03) | 0.1167 | 0.87 (0.77, 0.99) |
| Isoflavones       | Ref | 1.45 (1.03, 2.06) | 1.12 (0.78, 1.60) | 1.19 (0.83, 1.71) | 1.36 (0.94, 1.97) | 0.3151 | 1.05 (0.94, 1.17) |
| Proanthocyanidins | Ref | 1.04 (0.76, 1.44) | 0.97 (0.70, 1.36) | 0.77 (0.54, 1.09) | 0.72 (0.50, 1.05) | 0.0247 | 0.88 (0.77, 0.99) |
| Flavonols         | Ref | 1.49 (1.08, 2.05) | 0.90 (0.63, 1.30) | 0.97 (0.68, 1.38) | 0.82 (0.56, 1.19) | 0.0381 | 0.84 (0.73, 0.97) |
| Flavones          | Ref | 1.01 (0.73, 1.41) | 1.01 (0.72, 1.41) | 0.84 (0.59, 1.20) | 0.85 (0.59, 1.22) | 0.2322 | 0.90 (0.80, 1.01) |
| Flavanones        | Ref | 0.83 (0.59, 1.17) | 1.23 (0.89, 1.68) | 0.94 (0.67, 1.31) | 0.82 (0.57, 1.18) | 0.3313 | 0.94 (0.83, 1.06) |
| Flavan-3-ols      | Ref | 0.89 (0.64, 1.24) | 1.12 (0.81, 1.55) | 0.79 (0.55, 1.12) | 0.75 (0.52, 1.08) | 0.0744 | 0.90 (0.79, 1.01) |
| TAC               | Ref | 1.08 (0.78, 1.49) | 0.95 (0.68, 1.33) | 0.87 (0.62, 1.24) | 0.73 (0.50, 1.06) | 0.0448 | 0.85 (0.75, 0.96) |
| Women             |     |                   |                   |                   |                   |        |                   |
| Total flavonoid   | Ref | 0.90 (0.66, 1.22) | 0.82 (0.60, 1.12) | 0.61 (0.44, 0.87) | 0.54 (0.38, 0.78) | 0.0001 | 0.80 (0.70, 0.90) |
| Anthocyanidins    | Ref | 0.91 (0.68, 1.23) | 0.63 (0.45, 0.87) | 0.71 (0.52, 0.99) | 0.56 (0.39, 0.79) | 0.0006 | 0.85 (0.75, 0.97) |
| Isoflavones       | Ref | 0.98 (0.71, 1.34) | 0.71 (0.51, 0.99) | 0.81 (0.58, 1.13) | 0.78 (0.56, 1.10) | 0.1353 | 0.92 (0.82, 1.04) |
| Proanthocyanidins | Ref | 0.90 (0.66, 1.23) | 1.04 (0.77, 1.41) | 0.66 (0.47, 0.93) | 0.50 (0.34, 0.72) | <.0001 | 0.79 (0.70, 0.90) |
| Flavonols         | Ref | 0.83 (0.61, 1.12) | 0.68 (0.49, 0.94) | 0.57 (0.41, 0.80) | 0.61 (0.43, 0.86) | 0.0040 | 0.88 (0.77, 1.00) |
| Flavones          | Ref | 0.81 (0.60, 1.10) | 0.74 (0.54, 1.01) | 0.54 (0.38, 0.76) | 0.56 (0.39, 0.79) | 0.0003 | 0.81 (0.71, 0.93) |
| Flavanones        | Ref | 0.73 (0.54, 0.98) | 0.56 (0.41, 0.77) | 0.57 (0.41, 0.78) | 0.54 (0.39, 0.76) | 0.0005 | 0.83 (0.73, 0.95) |
| Flavan-3-ols      | Ref | 0.83 (0.60, 1.13) | 0.79 (0.57, 1.08) | 0.64 (0.45, 0.90) | 0.79 (0.57, 1.10) | 0.3681 | 0.93 (0.82, 1.05) |
| TAC               | Ref | 0.82 (0.60, 1.11) | 0.86 (0.64, 1.17) | 0.51 (0.36, 0.73) | 0.58 (0.40, 0.83) | 0.0004 | 0.81 (0.71, 0.92) |

215 Results are presented as the hazard ratio (HR) for a standard deviation (SD) increment in dietary antioxidant  
216 capacity using a cox model.

217 The multivariable Cox proportional hazards regression model was adjusted for age, body mass index (BMI),  
218 educational level, physical activity, drinking status, smoking status, and total energy intake.

219 Total flavonoid intake was the sum of anthocyanidins, isoflavones, proanthocyanidins, flavonols, flavones,  
220 flavanones, and flavan-3-ols.

221 Total antioxidant capacity (TAC) was obtained by combining the individual antioxidant capacity of each  
222 antioxidant derived from every food item.

223

224 We also performed stratified analyses according to age, BMI, drinking status for both  
225 sexes, and smoking status for men participants. Figure 1 shows the HRs of T2D mellitus in  
226 the Q5 and Q1 groups according to baseline age, baseline BMI, and alcohol drinking status

12

1  
2  
3 227 in the HEXA study. There was almost no significant association between T2D mellitus and  
4  
5 228 dietary intake of antioxidant components in men participants. However, total flavonoid  
6  
7 229 intake and dietary TAC showed a protective effect against the development of T2D mellitus  
8  
9 230 in women participants who were aged > 52 years, had a BMI  $\geq$  25 kg/m<sup>2</sup>, and regardless of  
10  
11 231 alcohol consumption.  
12  
13

## 14 15 232 **Discussion**

16  
17  
18 233 In this study, we discovered that dietary total flavonoid consumption and TAC are both  
19  
20 234 associated with a reduced risk of developing T2D mellitus. After further analysis stratified  
21  
22 235 according to age, and BMI, we found that dietary total flavonoid consumption and TAC had  
23  
24 236 a protective effect against the development of type 2 diabetes mellitus in women participants  
25  
26 237 who were overweight or aged > 52 years.  
27  
28

29  
30 238 Oxidative stress, which is an imbalance between the production of reactive oxygen  
31  
32 239 species (free radicals) and antioxidant defense mechanism, is a risk factor for T2D.(17)  
33  
34 240 Previous studies have shown that oxidative stress impairs the secretion of insulin by  
35  
36 241 pancreatic beta cells and interferes with the insulin signaling pathway, thereby accelerating  
37  
38 242 the development and progression of T2D by increasing insulin resistance.(2, 3, 6, 31, 32)  
39  
40 243 Oxidative stress can be regulated by antioxidants, which react with reactive oxygen  
41  
42 244 species.(33) The consumption of dietary flavonoids has been shown to be associated with  
43  
44 245 lower incidences of T2D. Several previous studies have indicated that flavonoids decrease  
45  
46 246 plasma glucose levels and improve lipid profile, insulin secretion, and insulin resistance,  
47  
48 247 factors which are implicated in the development of T2D.(2, 3, 8, 34) In a previous study,  
49  
50 248 higher flavonol intake was associated with a 26% lower incidence of T2D.(35)(35) In  
51  
52 249 addition, the authors observed a marginally significant inverse association between flavan-  
53  
54 250 3-ol intake and the risk of T2D, but there was no association with anthocyanin intake.(35)(35)  
55  
56  
57  
58  
59  
60



1  
2  
3 251 Knekt et al.(36) reported a marginally significant inverse association between the intake of  
4  
5 252 the flavonols quercetin, and myricetin, but not kaempferol, and the incidence of T2D in  
6  
7  
8 253 Finnish men and women. Quercetin, in particular, is known to decrease plasma glucose  
9  
10 254 concentration, improve insulin concentration, preserve the integrity of pancreatic beta cells,  
11  
12 255 alleviate T2D symptoms, and reduce hepatic gene expression in streptozotocin-induced  
13  
14 256 diabetic models.(37)-Flavan-3-ol and isoflavone intake is associated with a reduced risk of  
15  
16  
17 257 T2D and improved insulin resistance and serum insulin concentrations.(38) Dietary flavone  
18  
19 258 intake is negatively associated with systolic blood pressure, triglyceride level,  
20  
21  
22 259 triglyceride/high-density lipoprotein-cholesterol level, and homeostatic model assessment  
23  
24 260 of insulin resistance. Flavone intake may have some beneficial effects in the reduction of  
25  
26 261 the prevalence of T2D in South Korean women.(8) Consumption of foods rich in  
27  
28 262 anthocyanins, particularly blueberries, apples, and pears, is also inversely associated with  
29  
30  
31 263 the risk of T2D in the United States.(39)

32  
33  
34 264 A key potential mechanism for the protective effect of flavonoids against T2D is the  
35  
36 265 protection of tissues from free oxygen radicals and lipid peroxidation through their  
37  
38 266 antioxidant activity.(40) In addition, anti-inflammatory functions, improvement of  
39  
40 267 endothelial functions, reduction of blood cholesterol concentration, and nicotinamide  
41  
42 268 adenine dinucleotide phosphate oxidase activity are also associated with a reduced risk of  
43  
44 269 T2D mellitus.(40) Flavonoids are known to interact with molecular targets and affect NF-  
45  
46 270  $\kappa$ B and MAPK signaling pathways.(34) Furthermore, flavonoids modulate postprandial  
47  
48 271 glucose levels by reducing the activities of digestive enzymes ( $\alpha$ -amylase and  $\alpha$ -glucosidase),  
49  
50 272 decreasing the active transport of glucose across the intestinal brush border membrane, and  
51  
52 273 inhibiting glucose transporters.(31) Antioxidant-rich fruits and vegetables contain relatively  
53  
54 274 high fiber content, which can influence the beneficial effects of antioxidants against T2D.(41)

1  
2  
3 275 Furthermore, it has been reported that flavonoids inhibit  $\alpha$ -glucosidase activity to alleviate  
4  
5 276 hyperglycemia.(42, 43)  
6  
7

8 277 The effect of each type of flavonoid intake on the risk of T2D varies by sex. In this  
9  
10 278 study, there was a correlation between anthocyanidin and proanthocyanidin intake and the  
11  
12 279 risk of developing T2D in men. However, there was a greater correlation between the risk  
13  
14 280 of T2D and intake of flavonoids, such as anthocyanidins, proanthocyanidins, flavonols,  
15  
16 281 flavones, and flavanones, in women than in men. These sex-specific results are often seen  
17  
18 282 in other phytochemical-related studies. In a previous study conducted using 2008–2011 data  
19  
20 283 from the Korea National Health and Nutrition Examination Survey, a high intake of  
21  
22 284 flavonoids did not reduce the incidence of obesity and abdominal obesity in men but  
23  
24 285 significantly reduced obesity (18%) in women. In addition, high flavonoid intake was  
25  
26 286 reported to reduce the incidence of abdominal obesity (19%) in that study.(2, 44, 45) The  
27  
28 287 variations in these results appear to be due to differences between the dietary intake patterns  
29  
30 288 of South Korean men and women. Sex-specific dietary patterns have been reported in  
31  
32 289 previous studies; namely, men consume the recommended amount of vegetables more than  
33  
34 290 women, whereas women consume the recommended amount of fruit more than men.(46) In  
35  
36 291 addition, women generally consume higher amounts of dietary antioxidants than men.(2, 47)  
37  
38 292 Higher intake of dietary antioxidants can induce high plasma concentrations of antioxidants  
39  
40 293 and more beneficial effects on preventing development of T2D. Furthermore, gonadal  
41  
42 294 hormones (menopausal estrogen and testosterone) have been implicated in sex-specific  
43  
44 295 differences in glucose homeostasis.(48) Healthy women have lower skeletal muscle mass,  
45  
46 296 higher adipose tissue mass, more circulating free fatty acids, and higher intramyocellular  
47  
48 297 lipid content than men of the same age. These are all factors that could promote increased  
49  
50 298 insulin resistance in women compared with men.(48)  
51  
52  
53  
54  
55  
56  
57  
58  
59  
60

1  
2  
3 299 Various factors, such as age and lifestyle, are known to contribute to the development  
4  
5 300 and progression of T2D.(17) The prevalence of T2D in South Koreans increases rapidly with  
6  
7  
8 301 age.(4) Unhealthy lifestyle habits, such as smoking, excessive alcohol consumption, and  
9  
10 302 inactivity, are known to contribute to the development of diabetes.(3, 49) We found that men  
11  
12 303 with T2D were older and more likely to be current drinkers and current smokers than those  
13  
14 304 without diabetes. However, our stratified analysis showed that there was no correlation  
15  
16 305 between these factors except for current alcohol consumption. On the other hand, women  
17  
18 306 with T2D were significantly older and had significantly higher BMI than those without  
19  
20 307 diabetes. Furthermore, the stratified analysis showed that antioxidant consumption was  
21  
22 308 inversely related to the HR of T2D in older women (> 52 years), women with a BMI > 25  
23  
24 309 kg/m<sup>2</sup>, regardless of alcohol consumption. Although it is difficult to fully explain these  
25  
26 310 variations in South Korean adults, these findings suggest that high antioxidant intake may  
27  
28 311 be related to a decreased risk of T2D, especially in women with specific lifestyle habits.  
29  
30  
31  
32  
33

### 34 **Strengths and limitations**

35  
36 313 The main strength of this study was that it was conducted using a large-scale  
37  
38 314 community-based genomic cohort study with 5 years of follow-up on average. Stratified  
39  
40 315 analyses were conducted in the current study to focus on one certain exposure. This study  
41  
42 316 had some limitations. First, although this study reported a longitudinal relationship between  
43  
44 317 dietary antioxidant consumption and T2D incidence, we did not assess the causality. Second,  
45  
46 318 we obtained dietary information and information on the intake of antioxidant components  
47  
48 319 using self-reported FFQ; thus, dietary measurement errors were inevitable. However, the  
49  
50 320 106-item FFQ has been previously verified.(26) In addition, further studies are needed to  
51  
52 321 measure the flavonoid concentration to verify the data. Third, we did not quantify the  
53  
54 322 amount of alcohol consumption and smoking. Nevertheless, we found no association  
55  
56  
57  
58  
59  
60

1  
2  
3 323 between smoking status and T2D after stratification analyses. Dietary antioxidants showed  
4  
5 324 a protective effect against the development of T2D only in women who were non-drinkers.  
6  
7

## 8 325 **Conclusions**

10  
11 326 The findings of this large-scale prospective cohort study suggest that dietary  
12  
13 327 antioxidant consumption is associated with a lower risk of T2D in South Korean adults. The  
14  
15 328 findings of this study can serve as a reference or guide for the modification of food intake  
16  
17 329 recommendations in dietary guideline policies in South Korea. However, further studies are  
18  
19 330 needed to validate the results of this study.  
20  
21  
22

23  
24 331

## 26 332 **Declarations**

### 29 333 **Ethics approval and consent to participate**

31  
32 334 All participants voluntarily signed an informed written consent form before enrollment.  
33  
34 335 This study was performed in accordance with the guidelines specified in the Declaration of  
35  
36 336 Helsinki, and the study protocol was approved by the local Institutional Review Board (IRB)  
37  
38 337 of the Ethics Committee of the Korean Genome and Epidemiology Study of the Korea  
39  
40 338 National Institute of Health (IRB no. 2014-08-02-3C-A).  
41  
42  
43

44  
45 339

### 47 340 **Consent for publication**

48  
49  
50 341 Not applicable.  
51  
52

53  
54 342

### 56 343 **Availability of data and materials**

1  
2  
3 344 The data that support the findings of this study are available from the National  
4  
5 345 Genome Research Institute, Korea Centers for Disease Control and Prevention. How  
6  
7  
8 346 ever, restrictions apply to the availability of these data, which were used under lice  
9  
10 347 nse for this study, and as such are not publicly available. Data are however availa  
11  
12 348 ble from the authors upon reasonable request and with permission of the National  
13  
14 349 Genome Research Institute, Korea Centers for Disease Control and Prevention.  
15  
16

17 350

### 20 351 **Competing interests**

22  
23 352 The authors declare that they have no competing interests.  
24  
25

26 353

### 29 354 **Funding**

31  
32 355 This research was supported by the National Research Foundation of Korea (NRF) grant  
33  
34 356 funded by the Korea government (MSIT) (No.2020R1C1C1014286). MSIT: Ministry of  
35  
36 357 Science and ICT. The study sponsor/funder was not involved in the design of the study; the  
37  
38 358 collection, analysis, and interpretation of data; writing the report; and did not impose any  
39  
40 359 restrictions regarding the publication of the report.  
41  
42  
43

44 360

### 47 361 **Authors' contributions**

48  
49  
50 362 S.S. supervised the project. S.S. contributed to the conceptualization or design of this  
51  
52 363 study. S.J. and H.J. were contributed to establish the antioxidants database. L.J.T  
53  
54 364 conducted the formal analysis. S.S. verified and validated the outcomes. L.J.T and S.B.H.  
55  
56 365 co-wrote the first draft of the manuscript. S.J. and H.J. reviewed and revised the article  
57  
58  
59  
60

1  
2  
3 366 critically. All authors approved the final version of the article for publication. S.S. and  
4  
5 367 L.J.T had full access to all the data in the study and take full responsibility for the integrity  
6  
7  
8 368 of the data and accuracy of the data analysis.  
9  
10  
11 369

12  
13  
14 370 **Acknowledgments**

15  
16 371 This study was performed using data from the HEXA study, which was suppor  
17  
18 372 ted by the National Genome Research Institute, Korea Centers for Disease Control  
19  
20  
21 373 and Prevention.  
22  
23  
24 374

375 **References**

- 376 1. Bacanlı M., Dilsiz S. A., Başaran N., Başaran A. A. Effects of phytochemicals against  
377 diabetes. *Advances in Food and Nutrition Research* 2019; 89: 209-238.
- 378 2. Yeon JY, Bae YJ, Kim EY, Lee EJ. Association between flavonoid intake and diabetes  
379 risk among the Koreans. *Clin Chim Acta* 2015; 439: 225-230.
- 380 3. Quansah DY, Ha K, Jun S, et al. Associations of dietary antioxidants and risk of type 2  
381 diabetes: data from the 2007–2012 Korea National Health and Nutrition Examination  
382 Survey. *Molecules* 2017; 22(10): 1664.
- 383 4. Kim BY, Won JC, Lee JH, et al. Diabetes Fact Sheets in Korea, 2018: An Appraisal of  
384 Current Status. *Diabetes Metab J* 2019; 43(4): 487-494.
- 385 5. Kim DH, Yu TY. Diabetes and Sarcopenia. *J Korean Diabetes* 2017; 18(4): 239-247.
- 386 6. Burton-Freeman B., Brzeziński M., Park E., et al. A selective role of dietary  
387 anthocyanins and flavan-3-ols in reducing the risk of type 2 diabetes mellitus: a review  
388 of recent evidence. *Nutrients* 2019; 11(4): 841.
- 389 7. Girish Sharma, Dhan Prakash, Charu Gupta, *Phytochemicals of nutraceutical*  
390 *importance: do they defend against diseases*, in *Phytochemicals of nutraceutical*  
391 *importance*, Prakash D. and Sharma G., Editors. 2014, CABI, Nosworthy Way. p. 1-24.  
392 10.1079/9781780643632.0001.
- 393 8. Oh JS, Kim H, Vijayakumar A, et al. Association of dietary flavonoid intake with  
394 prevalence of type 2 diabetes mellitus and cardiovascular disease risk factors in Korean  
395 women aged  $\geq$  30 years. *J Nutr Sci Vitaminol (Tokyo)* 2017; 63(1): 51-58.
- 396 9. Kawser Hossain M, Abdal Dayem A, Han J, et al. Molecular mechanisms of the anti-  
397 obesity and anti-diabetic properties of flavonoids. *Int J Mol Sci* 2016; 17(4): 569.
- 398 10. Panche AN, Diwan AD, Chandra SR. Flavonoids: an overview. *J Nutr Sci* 2016; 5: e47.

- 1  
2  
3 399 11. Jun S., Shin S., Joung H. Estimation of dietary flavonoid intake and major food sources  
4  
5 400 of Korean adults. *Br J Nutr* 2016; 115(3): 480-489.  
6  
7  
8 401 12. Jafari Azad B., Yaseri M., Daneshzad E., Koohdani F. Interaction between Apo A-II -  
9  
10 402 265T>C polymorphism and dietary total antioxidant capacity on some anthropometric  
11  
12 403 indices and serum lipid profile in patients with type 2 diabetes mellitus. *J Nutr Sci* 2021;  
13  
14 404 10: e9.  
15  
16  
17 405 13. Qi S., Xin Y., Guo Y., et al. Ampelopsin reduces endotoxic inflammation via repressing  
18  
19 406 ROS-mediated activation of PI3K/Akt/NF-kappaB signaling pathways. *Int*  
20  
21 407 *Immunopharmacol* 2012; 12(1): 278-87.  
22  
23  
24 408 14. Arulselvan P., Fard M. T., Tan W. S., et al. Role of Antioxidants and Natural Products  
25  
26 409 in Inflammation. *Oxid Med Cell Longev* 2016; 2016: 5276130.  
27  
28  
29 410 15. Ramachandran V., Saravanan R. Glucose uptake through translocation and activation of  
30  
31 411 GLUT4 in PI3K/Akt signaling pathway by asiatic acid in diabetic rats. *Hum Exp Toxicol*  
32  
33 412 2015; 34(9): 884-93.  
34  
35  
36 413 16. Li SS, Wu J, Chen LG, et al. Biogenesis of C-glycosyl flavones and profiling of  
37  
38 414 flavonoid glycosides in lotus (*Nelumbo nucifera*). *PLoS One* 2014; 9(10): e108860.  
39  
40 415 17. Halim M., Halim A. The effects of inflammation, aging and oxidative stress on the  
41  
42 416 pathogenesis of diabetes mellitus (type 2 diabetes). *Diabetes & Metabolic Syndrome:*  
43  
44 417 *Clinical Research & Reviews*, 2019; 13(2): 1165-1172.  
45  
46  
47 418 18. Kim SA, Kim J, Jun S, et al. Association between dietary flavonoid intake and obesity  
48  
49 419 among adults in Korea. *Appl Physiol Nutr Metab* 2020; 45(2): 203-212.  
50  
51  
52 420 19. Kim SA, Joung H, Shin S. Dietary pattern, dietary total antioxidant capacity, and  
53  
54 421 dyslipidemia in Korean adults. *Nutr J* 2019; 18(1): 37.  
55  
56 422 20. Park S, Ham JO, Lee BK. Effects of total vitamin A, vitamin C, and fruit intake on risk  
57  
58 423 for metabolic syndrome in Korean women and men. *Nutrition* 2015; 31(1): 111-118.  
59  
60



- 1  
2  
3 424 21. Kim S, Song Y, Lee JE, et al. Total antioxidant capacity from dietary supplement  
4  
5 425 decreases the likelihood of having metabolic syndrome in Korean adults. *Nutrients* 2017;  
6  
7 426 9(10): 1055.  
8  
9  
10 427 22. Jafari Azad B., Yaseri M., Daneshzad E., Koohdani F. Interaction between Apo A-II -  
11  
12 428 265T > C polymorphism and dietary total antioxidant capacity on some oxidative stress  
13  
14 429 and inflammatory markers in patients with type 2 diabetes mellitus. *Br J Nutr* 2021: 1-  
15  
16 430 17.  
17  
18  
19 431 23. Daneshzad E., Keshavarz S. A., Qorbani M., Larijani B., Azadbakht L. Dietary total  
20  
21 432 antioxidant capacity and its association with sleep, stress, anxiety, and depression score:  
22  
23 433 A cross-sectional study among diabetic women. *Clin Nutr ESPEN* 2020; 37: 187-194.  
24  
25  
26 434 24. Health Examinees Study Group. The Health Examinees (HEXA) study: rationale, study  
27  
28 435 design and baseline characteristics. *Asian Pac J Cancer Prev* 2015; 16(4): 1591-1597.  
29  
30  
31 436 25. Shin S, Lim J, Lee HW, et al. Association between the prevalence of metabolic syndrome  
32  
33 437 and coffee consumption among Korean adults: results from the Health Examinees study.  
34  
35 438 *Appl Physiol Nutr Metab* 2019; 44(12): 1371-1378.  
36  
37  
38 439 26. Ahn Y., Kwon E., Shim J. E., et al. Validation and reproducibility of food frequency  
39  
40 440 questionnaire for Korean genome epidemiologic study. *Eur J Clin Nutr* 2007; 61(12):  
41  
42 441 1435-41.  
43  
44  
45 442 27. Jun S, Chun OK, Joung H. Estimation of dietary total antioxidant capacity of Korean  
46  
47 443 adults. *Eur J Nutr* 2018; 57(4): 1615-1625.  
48  
49  
50 444 28. Ko S. H., Kim S. R., Kim D. J., et al. 2011 clinical practice guidelines for type 2 diabetes  
51  
52 445 in Korea. *Diabetes Metab J* 2011; 35(5): 431-436.  
53  
54 446 29. Korea Disease Control and Prevention Agency. Obesity.  
55  
56 447 <https://health.kdca.go.kr/healthinfo/biz/health/gnrlzHealthInfo/gnrlzHealthInfo/gnrlzHe>  
57  
58 448 [althInfoView.do](https://health.kdca.go.kr/healthinfo/biz/health/gnrlzHealthInfo/gnrlzHealthInfo/gnrlzHealthInfoView.do). Published 15 July 2021. Accessed 2021.06.01.  
59  
60

- 1  
2  
3 449 30. Shin S, Lee HW, Kim CE, et al. Egg Consumption and Risk of Metabolic Syndrome in  
4  
5 450 Korean Adults: Results from the Health Examinees Study. *Nutrients* 2017; 9(7): 687.  
6  
7  
8 451 31. Chen J, Mangelinckx S, Adams A, et al. Natural flavonoids as potential herbal  
9  
10 452 medication for the treatment of diabetes mellitus and its complications. *Natural Product*  
11  
12 453 *Communications* 2015; 10(1): 187-200.  
13  
14 454 32. Rehman K., Akash M.S.H. Mechanisms of inflammatory responses and development of  
15  
16 455 insulin resistance: how are they interlinked? *J Biomed Sci* 2016; 23(1): 87.  
17  
18  
19 456 33. Ham D, Jun S, Kang M, et al. Consumption of Korean Foods with High Flavonoid  
20  
21 457 Contents Reduces the Likelihood of Having Elevated C-Reactive Protein Levels: Data  
22  
23 458 from the 2015–2017 Korea National Health and Nutrition Examination Survey.  
24  
25 459 *Nutrients* 2019; 11(10): 2370.  
26  
27  
28 460 34. Liu YJ, Zhan J, Liu XL, et al. Dietary flavonoids intake and risk of type 2 diabetes: a  
29  
30 461 meta-analysis of prospective cohort studies. *Clin Nutr* 2014; 33(1): 59-63.  
31  
32  
33 462 35. Jacques P. F., Cassidy A., Rogers G., et al. Higher dietary flavonol intake is associated  
34  
35 463 with lower incidence of type 2 diabetes. *J Nutr* 2013; 143(9): 1474-80.  
36  
37  
38 464 36. Knekt P., Kumpulainen J., Jarvinen R., et al. Flavonoid intake and risk of chronic  
39  
40 465 diseases. *Am J Clin Nutr* 2002; 76(3): 560-8.  
41  
42  
43 466 37. Dhanya R. Quercetin for managing type 2 diabetes and its complications, an insight into  
44  
45 467 multitarget therapy. *Biomed Pharmacother* 2022; 146: 112560.  
46  
47  
48 468 38. Curtis P. J., Sampson M., Potter J., et al. Chronic ingestion of flavan-3-ols and  
49  
50 469 isoflavones improves insulin sensitivity and lipoprotein status and attenuates estimated  
51  
52 470 10-year CVD risk in medicated postmenopausal women with type 2 diabetes: a 1-year,  
53  
54 471 double-blind, randomized, controlled trial. *Diabetes Care* 2012; 35(2): 226-32.  
55  
56 472 39. Reiland H., Slavin J. Systematic Review of Pears and Health. *Nutr Today* 2015; 50(6):  
57  
58 473 301-305.  
59  
60

- 1  
2  
3 474 40. Hussain T., Tan B., Murtaza G., et al. Flavonoids and type 2 diabetes: Evidence of  
4  
5 475 efficacy in clinical and animal studies and delivery strategies to enhance their therapeutic  
6  
7 476 efficacy. *Pharmacol Res* 2020; 152: 104629.
- 8  
9  
10 477 41. Wang PY, Fang JC, Gao ZH, Zhang C, SY. Xie. Higher intake of fruits, vegetables or  
11  
12 478 their fiber reduces the risk of type 2 diabetes: A meta-analysis. *J Diabetes Investig* 2016;  
13  
14  
15 479 7(1): 56-69.
- 16  
17  
18 480 42. Li YQ, Zhou FC, Gao F, Bian JS, Shan F. Comparative evaluation of quercetin,  
19  
20 481 isoquercetin and rutin as inhibitors of  $\alpha$ -glucosidase. *J Agric Food Chem* 2009; 57(24):  
21  
22 482 11463-11468.
- 23  
24  
25 483 43. Liu S, Li D, Huang B, et al. Inhibition of pancreatic lipase,  $\alpha$ -glucosidase,  $\alpha$ -amylase,  
26  
27 484 and hypolipidemic effects of the total flavonoids from *Nelumbo nucifera* leaves. *J*  
28  
29 485 *Ethnopharmacol* 2013; 149(1): 263-269.
- 30  
31  
32 486 44. Wedick NM, Pan A, Cassidy A, et al. Dietary flavonoid intakes and risk of type 2  
33  
34 487 diabetes in US men and women. *Am J Clin Nutr* 2012; 95(4): 925-933.
- 35  
36  
37 488 45. Im J, Kim M, Park K. Association between the Phytochemical Index and Lower  
38  
39 489 Prevalence of Obesity/Abdominal Obesity in Korean Adults. *Nutrients* 2020; 12(8):  
40  
41 490 2312.
- 42  
43  
44 491 46. Lee HS, Cho YH, Park J, Shin HR, Sung MK. Dietary intake of phytonutrients in relation  
45  
46 492 to fruit and vegetable consumption in Korea. *J Acad Nutr Diet* 2013; 113(9): 1194-1199.
- 47  
48  
49 493 47. Kim YJ, Park MY, Chang N, Kwon O. Intake and major sources of dietary flavonoid in  
50  
51 494 Korean adults: Korean National Health and Nutrition Examination Survey 2010-2012.  
52  
53 495 *Asia Pac J Clin Nutr* 2015; 24(3): 456-463.
- 54  
55 496 48. Mauvais-Jarvis F Gender differences in glucose homeostasis and diabetes. *Physiol*  
56  
57 497 *Behav* 2018; 187: 20-23.
- 58  
59  
60

1  
2  
3 498 49. American Diabetes Association. Nutrition recommendations and interventions for  
4  
5 499 diabetes: a position statement of the American Diabetes Association. Diabetes Care 2008;  
6  
7 500 31(Supplement 1): S61-S78.  
8  
9  
10  
11  
12

13 502 **Figure Legend**  
14  
15

16 503 **Figure 1.** Hazard ratios (HR) with 95% confidence intervals (CIs) for type 2 diabetes  
17  
18 504 mellitus after comparison of antioxidant consumption in the Q5 and Q1 groups according to  
19  
20 505 baseline age, baseline body mass index (BMI), alcohol consumption, smoking status in the  
21  
22 506 Health Examinees study. TAC: total antioxidant capacity  
23  
24  
25

26 507  
27  
28  
29  
30  
31  
32  
33  
34  
35  
36  
37  
38  
39  
40  
41  
42  
43  
44  
45  
46  
47  
48  
49  
50  
51  
52  
53  
54  
55  
56  
57  
58  
59  
60

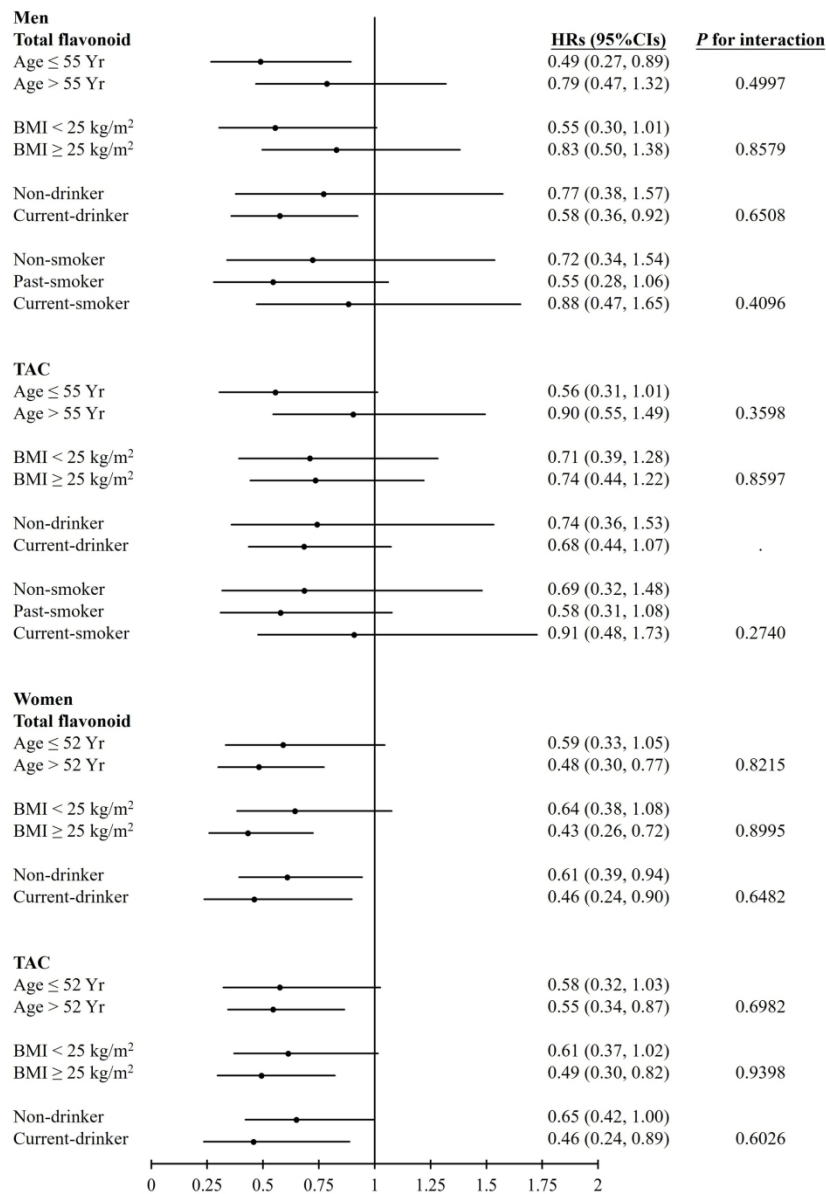

202x277mm (300 x 300 DPI)

**Table S1. Hazard ratios of type 2 diabetes during follow-up according to quintile of cumulative average antioxidant consumption in model 2**

|                   | Antioxidant consumption |                   |                   |                   |                   | <i>P</i> for trend | HR for a SD increment |
|-------------------|-------------------------|-------------------|-------------------|-------------------|-------------------|--------------------|-----------------------|
|                   | Q1                      | Q2                | Q3                | Q4                | Q5                |                    |                       |
| <b>Men</b>        |                         |                   |                   |                   |                   |                    |                       |
| Total flavonoid   | Ref                     | 0.97 (0.71, 1.34) | 0.89 (0.63, 1.25) | 0.89 (0.64, 1.24) | 0.62 (0.42, 0.92) | 0.0136             | 0.85 (0.75, 0.97)     |
| Anthocyanidins    | Ref                     | 0.78 (0.56, 1.10) | 0.98 (0.71, 1.35) | 0.85 (0.61, 1.19) | 0.70 (0.49, 1.01) | 0.0994             | 0.87 (0.76, 0.99)     |
| Isoflavones       | Ref                     | 1.44 (1.01, 2.04) | 1.10 (0.76, 1.59) | 1.18 (0.81, 1.70) | 1.32 (0.90, 1.95) | 0.4245             | 1.04 (0.92, 1.17)     |
| Proanthocyanidins | Ref                     | 1.04 (0.76, 1.44) | 0.97 (0.70, 1.36) | 0.77 (0.54, 1.09) | 0.72 (0.50, 1.04) | 0.0226             | 0.87 (0.77, 0.99)     |
| Flavonols         | Ref                     | 1.46 (1.06, 2.00) | 0.88 (0.61, 1.27) | 0.93 (0.64, 1.33) | 0.77 (0.52, 1.14) | 0.0218             | 0.82 (0.71, 0.95)     |
| Flavones          | Ref                     | 1.00 (0.72, 1.38) | 1.00 (0.71, 1.40) | 0.82 (0.57, 1.17) | 0.83 (0.57, 1.21) | 0.1941             | 0.89 (0.79, 1.01)     |
| Flavanones        | Ref                     | 0.83 (0.59, 1.17) | 1.21 (0.88, 1.67) | 0.93 (0.66, 1.30) | 0.81 (0.56, 1.16) | 0.2998             | 0.93 (0.83, 1.05)     |
| Flavan-3-ols      | Ref                     | 0.88 (0.63, 1.23) | 1.11 (0.80, 1.54) | 0.78 (0.55, 1.11) | 0.74 (0.51, 1.08) | 0.0719             | 0.89 (0.79, 1.01)     |
| TAC               | Ref                     | 1.07 (0.77, 1.47) | 0.94 (0.67, 1.31) | 0.85 (0.59, 1.20) | 0.71 (0.48, 1.05) | 0.0347             | 0.84 (0.74, 0.96)     |
| <b>Women</b>      |                         |                   |                   |                   |                   |                    |                       |
| Total flavonoid   | Ref                     | 0.92 (0.68, 1.24) | 0.84 (0.62, 1.15) | 0.63 (0.45, 0.89) | 0.55 (0.38, 0.80) | 0.0002             | 0.80 (0.71, 0.91)     |
| Anthocyanidins    | Ref                     | 0.92 (0.68, 1.24) | 0.64 (0.46, 0.89) | 0.72 (0.52, 1.00) | 0.56 (0.39, 0.80) | 0.0007             | 0.86 (0.75, 0.97)     |
| Isoflavones       | Ref                     | 0.99 (0.72, 1.35) | 0.72 (0.51, 1.02) | 0.84 (0.60, 1.17) | 0.83 (0.58, 1.18) | 0.2885             | 0.94 (0.84, 1.07)     |
| Proanthocyanidins | Ref                     | 0.92 (0.67, 1.25) | 1.07 (0.79, 1.45) | 0.67 (0.48, 0.95) | 0.51 (0.35, 0.74) | <.0001             | 0.79 (0.70, 0.90)     |
| Flavonols         | Ref                     | 0.85 (0.62, 1.15) | 0.69 (0.50, 0.96) | 0.59 (0.42, 0.83) | 0.62 (0.44, 0.89) | 0.0066             | 0.89 (0.78, 1.02)     |
| Flavones          | Ref                     | 0.82 (0.60, 1.11) | 0.75 (0.55, 1.03) | 0.54 (0.38, 0.77) | 0.57 (0.40, 0.81) | 0.0004             | 0.82 (0.71, 0.93)     |
| Flavanones        | Ref                     | 0.74 (0.55, 1.00) | 0.57 (0.41, 0.79) | 0.58 (0.42, 0.80) | 0.55 (0.40, 0.77) | 0.0008             | 0.84 (0.73, 0.96)     |
| Flavan-3-ols      | Ref                     | 0.84 (0.62, 1.15) | 0.81 (0.59, 1.12) | 0.66 (0.47, 0.92) | 0.81 (0.58, 1.13) | 0.4157             | 0.93 (0.82, 1.06)     |
| TAC               | Ref                     | 0.84 (0.62, 1.14) | 0.89 (0.65, 1.21) | 0.53 (0.37, 0.75) | 0.60 (0.42, 0.86) | 0.0007             | 0.81 (0.71, 0.93)     |

The multivariable Cox proportional-hazards regression model was adjusted for age, body mass index (BMI), educational level, physical activity, alcohol consumption, smoking status, total energy intake, energy percent from carbohydrate, energy percent from protein, and energy percent from fat.

Total flavonoid intake was the sum of anthocyanidins, isoflavones, proanthocyanidins, flavonols, flavones, flavanones, and flavan-3-ols.

Total antioxidant capacity (TAC) was obtained by combining the individual antioxidant capacity of each antioxidant derived from every food item.

**Table S2. Hazard ratios of type 2 diabetes during follow-up according to quintile of cumulative average antioxidant consumption in model 3**

|                   | Antioxidant consumption |                   |                   |                   |                   | <i>P</i> for trend | HR for a SD increment |
|-------------------|-------------------------|-------------------|-------------------|-------------------|-------------------|--------------------|-----------------------|
|                   | Q1                      | Q2                | Q3                | Q4                | Q5                |                    |                       |
| <b>Men</b>        |                         |                   |                   |                   |                   |                    |                       |
| Total flavonoid   | Ref                     | 1.00 (0.72, 1.39) | 0.94 (0.66, 1.34) | 0.98 (0.68, 1.40) | 0.71 (0.45, 1.13) | 0.1553             | 0.89 (0.76, 1.04)     |
| Anthocyanidins    | Ref                     | 0.82 (0.58, 1.15) | 1.06 (0.76, 1.47) | 0.96 (0.67, 1.37) | 0.85 (0.56, 1.30) | 0.6471             | 0.92 (0.79, 1.08)     |
| Isoflavones       | Ref                     | 1.53 (1.08, 2.18) | 1.22 (0.84, 1.76) | 1.31 (0.90, 1.89) | 1.61 (1.09, 2.38) | 0.0731             | 1.12 (0.99, 1.26)     |
| Proanthocyanidins | Ref                     | 1.06 (0.77, 1.46) | 1.02 (0.72, 1.43) | 0.83 (0.58, 1.20) | 0.81 (0.54, 1.22) | 0.1640             | 0.92 (0.79, 1.06)     |
| Flavonols         | Ref                     | 1.54 (1.12, 2.13) | 0.96 (0.66, 1.39) | 1.05 (0.72, 1.54) | 0.97 (0.62, 1.52) | 0.3271             | 0.88 (0.74, 1.05)     |
| Flavones          | Ref                     | 1.06 (0.76, 1.48) | 1.09 (0.77, 1.54) | 0.95 (0.65, 1.38) | 1.07 (0.69, 1.65) | 0.9493             | 0.96 (0.83, 1.11)     |
| Flavanones        | Ref                     | 0.85 (0.61, 1.21) | 1.29 (0.94, 1.79) | 1.03 (0.73, 1.47) | 0.95 (0.64, 1.40) | 0.8985             | 0.98 (0.87, 1.11)     |
| Flavan-3-ols      | Ref                     | 0.93 (0.66, 1.29) | 1.19 (0.86, 1.66) | 0.85 (0.59, 1.23) | 0.84 (0.57, 1.23) | 0.2206             | 0.92 (0.81, 1.05)     |
| TAC               | Ref                     | 1.13 (0.81, 1.57) | 1.02 (0.71, 1.45) | 0.98 (0.67, 1.44) | 0.88 (0.55, 1.40) | 0.3967             | 0.88 (0.75, 1.04)     |
| <b>Women</b>      |                         |                   |                   |                   |                   |                    |                       |
| Total flavonoid   | Ref                     | 0.90 (0.66, 1.23) | 0.82 (0.59, 1.13) | 0.62 (0.43, 0.89) | 0.54 (0.35, 0.83) | 0.0015             | 0.79 (0.68, 0.93)     |
| Anthocyanidins    | Ref                     | 0.93 (0.69, 1.25) | 0.64 (0.46, 0.90) | 0.73 (0.52, 1.04) | 0.58 (0.39, 0.86) | 0.0054             | 0.88 (0.77, 1.02)     |
| Isoflavones       | Ref                     | 1.01 (0.74, 1.39) | 0.75 (0.53, 1.06) | 0.88 (0.63, 1.23) | 0.89 (0.62, 1.27) | 0.4969             | 0.97 (0.86, 1.10)     |
| Proanthocyanidins | Ref                     | 0.91 (0.67, 1.25) | 1.05 (0.78, 1.43) | 0.67 (0.47, 0.96) | 0.51 (0.34, 0.77) | 0.0003             | 0.80 (0.69, 0.92)     |
| Flavonols         | Ref                     | 0.83 (0.61, 1.14) | 0.69 (0.49, 0.97) | 0.58 (0.40, 0.85) | 0.62 (0.41, 0.96) | 0.0355             | 0.92 (0.78, 1.09)     |
| Flavones          | Ref                     | 0.81 (0.60, 1.11) | 0.75 (0.54, 1.03) | 0.55 (0.38, 0.79) | 0.57 (0.38, 0.85) | 0.0029             | 0.82 (0.70, 0.96)     |
| Flavanones        | Ref                     | 0.74 (0.55, 1.00) | 0.57 (0.42, 0.79) | 0.58 (0.42, 0.81) | 0.58 (0.40, 0.82) | 0.0038             | 0.86 (0.74, 0.99)     |
| Flavan-3-ols      | Ref                     | 0.85 (0.62, 1.17) | 0.83 (0.60, 1.15) | 0.69 (0.48, 0.98) | 0.87 (0.61, 1.23) | 0.7719             | 0.96 (0.84, 1.09)     |
| TAC               | Ref                     | 0.82 (0.60, 1.12) | 0.86 (0.62, 1.19) | 0.51 (0.34, 0.75) | 0.57 (0.36, 0.89) | 0.0039             | 0.80 (0.67, 0.95)     |

The multivariable Cox proportional-hazards regression model was adjusted for age, body mass index (BMI), educational level, physical activity, drinking status, smoking status, and dietary fiber intake.

Total flavonoid intake was the sum of anthocyanidins, isoflavones, proanthocyanidins, flavonols, flavones, flavanones, and flavan-3-ols.

Total antioxidant capacity (TAC) was obtained by combining the individual antioxidant capacity of each antioxidant derived from every food item.

## STROBE Statement—checklist of items that should be included in reports of observational studies

|                           | Item No | Recommendation                                                                                                                                                                                                         | Page number |
|---------------------------|---------|------------------------------------------------------------------------------------------------------------------------------------------------------------------------------------------------------------------------|-------------|
| <b>Title and abstract</b> | 1       | (a) Indicate the study's design with a commonly used term in the title or the abstract                                                                                                                                 | Page 1      |
|                           |         | (b) Provide in the abstract an informative and balanced summary of what was done and what was found                                                                                                                    | Pages 2–3   |
| <b>Introduction</b>       |         |                                                                                                                                                                                                                        |             |
| Background/rationale      | 2       | Explain the scientific background and rationale for the investigation being reported                                                                                                                                   | Pages 4–5   |
| Objectives                | 3       | State specific objectives, including any prespecified hypotheses                                                                                                                                                       | Pages 5–6   |
| <b>Methods</b>            |         |                                                                                                                                                                                                                        |             |
| Study design              | 4       | Present key elements of study design early in the paper                                                                                                                                                                |             |
| Setting                   | 5       | Describe the setting, locations, and relevant dates, including periods of recruitment, exposure, follow-up, and data collection                                                                                        | Page 6      |
| Participants              | 6       | (a) <i>Cohort study</i> —Give the eligibility criteria, and the sources and methods of selection of participants. Describe methods of follow-up                                                                        | Pages 6–7   |
|                           |         | <i>Case-control study</i> —Give the eligibility criteria, and the sources and methods of case ascertainment and control selection. Give the rationale for the choice of cases and controls                             |             |
|                           |         | <i>Cross-sectional study</i> —Give the eligibility criteria, and the sources and methods of selection of participants                                                                                                  | Pages 6–7   |
|                           |         | (b) <i>Cohort study</i> —For matched studies, give matching criteria and number of exposed and unexposed<br><i>Case-control study</i> —For matched studies, give matching criteria and the number of controls per case |             |
| Variables                 | 7       | Clearly define all outcomes, exposures, predictors, potential confounders, and effect modifiers. Give diagnostic criteria, if applicable                                                                               | Pages 7–9   |
| Data sources/measurement  | 8*      | For each variable of interest, give sources of data and details of methods of assessment (measurement). Describe comparability of assessment methods if there is more than one group                                   | Pages 7–9   |
| Bias                      | 9       | Describe any efforts to address potential sources of bias                                                                                                                                                              | Pages 17–18 |
| Study size                | 10      | Explain how the study size was arrived at                                                                                                                                                                              | Pages 6–7   |
| Quantitative variables    | 11      | Explain how quantitative variables were handled in the analyses. If applicable, describe which groupings were chosen and why                                                                                           | Page 9      |
| Statistical methods       | 12      | (a) Describe all statistical methods, including those used to control for confounding                                                                                                                                  | Page 9      |
|                           |         | (b) Describe any methods used to examine subgroups and interactions                                                                                                                                                    |             |
|                           |         | (c) Explain how missing data were addressed                                                                                                                                                                            |             |
|                           |         | (d) <i>Cohort study</i> —If applicable, explain how loss to follow-up was addressed<br><i>Case-control study</i> —If applicable, explain how matching of cases and controls was addressed                              |             |



*Cross-sectional study*—If applicable, describe analytical methods taking account of sampling strategy

(e) Describe any sensitivity analyses

| <b>Results</b>           |     |                                                                                                                                                                                                                                                                                                                                                                                                               |             |
|--------------------------|-----|---------------------------------------------------------------------------------------------------------------------------------------------------------------------------------------------------------------------------------------------------------------------------------------------------------------------------------------------------------------------------------------------------------------|-------------|
| Participants             | 13* | (a) Report numbers of individuals at each stage of study—eg numbers potentially eligible, examined for eligibility, confirmed eligible, included in the study, completing follow-up, and analysed<br>(b) Give reasons for non-participation at each stage<br>(c) Consider use of a flow diagram                                                                                                               | Pages 10–14 |
| Descriptive data         | 14* | (a) Give characteristics of study participants (eg demographic, clinical, social) and information on exposures and potential confounders<br>(b) Indicate number of participants with missing data for each variable of interest<br>(c) <i>Cohort study</i> —Summarise follow-up time (eg, average and total amount)                                                                                           | Pages 10–12 |
| Outcome data             | 15* | <i>Cohort study</i> —Report numbers of outcome events or summary measures over time<br><i>Case-control study</i> —Report numbers in each exposure category, or summary measures of exposure<br><i>Cross-sectional study</i> —Report numbers of outcome events or summary measures                                                                                                                             | Page 11     |
| Main results             | 16  | (a) Give unadjusted estimates and, if applicable, confounder-adjusted estimates and their precision (eg, 95% confidence interval). Make clear which confounders were adjusted for and why they were included<br>(b) Report category boundaries when continuous variables were categorized<br>(c) If relevant, consider translating estimates of relative risk into absolute risk for a meaningful time period | Pages 12–13 |
| Other analyses           | 17  | Report other analyses done—eg analyses of subgroups and interactions, and sensitivity analyses                                                                                                                                                                                                                                                                                                                | Page 14     |
| <b>Discussion</b>        |     |                                                                                                                                                                                                                                                                                                                                                                                                               |             |
| Key results              | 18  | Summarise key results with reference to study objectives                                                                                                                                                                                                                                                                                                                                                      | Page 14     |
| Limitations              | 19  | Discuss limitations of the study, taking into account sources of potential bias or imprecision. Discuss both direction and magnitude of any potential bias                                                                                                                                                                                                                                                    | Pages 17–18 |
| Interpretation           | 20  | Give a cautious overall interpretation of results considering objectives, limitations, multiplicity of analyses, results from similar studies, and other relevant evidence                                                                                                                                                                                                                                    | Pages 14–17 |
| Generalisability         | 21  | Discuss the generalisability (external validity) of the study results                                                                                                                                                                                                                                                                                                                                         | Page 18     |
| <b>Other information</b> |     |                                                                                                                                                                                                                                                                                                                                                                                                               |             |
| Funding                  | 22  | Give the source of funding and the role of the funders for the present study and, if applicable, for the original study on which the present article is based                                                                                                                                                                                                                                                 | Page 19     |

\*Give information separately for cases and controls in case-control studies and, if applicable, for exposed and unexposed groups in cohort and cross-sectional studies.

**Note:** An Explanation and Elaboration article discusses each checklist item and gives methodological background and published examples of transparent reporting. The STROBE checklist is best used in conjunction with this article (freely available on the Web sites of PLoS Medicine at <http://www.plosmedicine.org/>, Annals of Internal Medicine at <http://www.annals.org/>, and Epidemiology at <http://www.epidem.com/>). Information on the STROBE Initiative is available at [www.strobe-statement.org](http://www.strobe-statement.org).

# BMJ Open

## Dietary antioxidant consumption and the risk of type 2 diabetes in South Korean adults: A prospective cohort study based on the Health Examinees study

|                                 |                                                                                                                                                                                                                                                                                                                                                                                                                                                           |
|---------------------------------|-----------------------------------------------------------------------------------------------------------------------------------------------------------------------------------------------------------------------------------------------------------------------------------------------------------------------------------------------------------------------------------------------------------------------------------------------------------|
| Journal:                        | <i>BMJ Open</i>                                                                                                                                                                                                                                                                                                                                                                                                                                           |
| Manuscript ID                   | bmjopen-2022-065073.R1                                                                                                                                                                                                                                                                                                                                                                                                                                    |
| Article Type:                   | Original research                                                                                                                                                                                                                                                                                                                                                                                                                                         |
| Date Submitted by the Author:   | 23-Jun-2022                                                                                                                                                                                                                                                                                                                                                                                                                                               |
| Complete List of Authors:       | TAN, LIJUAN; Chung Ang University - Anseong Campus, Department of Food and Nutrition<br>Hwang, Su Bin; Chung-Ang University, Department of Food and Nutrition<br>Jun, Shinyoung; Graduate School of Cancer Science and Policy, Department of Cancer Biomedical Science<br>Joung, Hyojee; Seoul National University, Department of Public Health, Graduate School of Public Health<br>Shin, Sangah; Chung-Ang University, Department of Food and Nutrition |
| <b>Primary Subject Heading</b>: | Epidemiology                                                                                                                                                                                                                                                                                                                                                                                                                                              |
| Secondary Subject Heading:      | Diabetes and endocrinology, Nutrition and metabolism, Public health                                                                                                                                                                                                                                                                                                                                                                                       |
| Keywords:                       | DIABETES & ENDOCRINOLOGY, EPIDEMIOLOGY, NUTRITION & DIETETICS, PUBLIC HEALTH, STATISTICS & RESEARCH METHODS                                                                                                                                                                                                                                                                                                                                               |
|                                 |                                                                                                                                                                                                                                                                                                                                                                                                                                                           |

SCHOLARONE™  
Manuscripts



I, the Submitting Author has the right to grant and does grant on behalf of all authors of the Work (as defined in the below author licence), an exclusive licence and/or a non-exclusive licence for contributions from authors who are: i) UK Crown employees; ii) where BMJ has agreed a CC-BY licence shall apply, and/or iii) in accordance with the terms applicable for US Federal Government officers or employees acting as part of their official duties; on a worldwide, perpetual, irrevocable, royalty-free basis to BMJ Publishing Group Ltd ("BMJ") its licensees and where the relevant Journal is co-owned by BMJ to the co-owners of the Journal, to publish the Work in this journal and any other BMJ products and to exploit all rights, as set out in our [licence](#).

The Submitting Author accepts and understands that any supply made under these terms is made by BMJ to the Submitting Author unless you are acting as an employee on behalf of your employer or a postgraduate student of an affiliated institution which is paying any applicable article publishing charge ("APC") for Open Access articles. Where the Submitting Author wishes to make the Work available on an Open Access basis (and intends to pay the relevant APC), the terms of reuse of such Open Access shall be governed by a Creative Commons licence – details of these licences and which [Creative Commons](#) licence will apply to this Work are set out in our licence referred to above.

Other than as permitted in any relevant BMJ Author's Self Archiving Policies, I confirm this Work has not been accepted for publication elsewhere, is not being considered for publication elsewhere and does not duplicate material already published. I confirm all authors consent to publication of this Work and authorise the granting of this licence.

1 **Dietary antioxidant consumption and the risk of type 2 diabetes in South Korean adults:**  
2  
3  
4  
5 **A prospective cohort study based on the Health Examinees study**  
6  
7

8  
9 Li-Juan Tan <sup>1\*</sup>, Su Bin Hwang <sup>1\*</sup>, Shinyoung Jun <sup>2</sup>, Hyojee Joung <sup>3</sup>, Sangah Shin<sup>1§</sup>  
10  
11

12 <sup>1</sup> Department of Food and Nutrition, Chung-Ang University, Gyeonggi-do 17546, South  
13  
14 Korea  
15

16  
17  
18 <sup>2</sup> Department of Cancer Biomedical Science, Graduate School of Cancer Science and Policy,  
19  
20 Goyang 10408, South Korea  
21  
22

23  
24 <sup>3</sup> Department of Public Health, Graduate School of Public Health, Seoul National University,  
25  
26 Seoul 08826, South Korea  
27  
28

29  
30 \*Co-first authors: These authors contributed equally to this work  
31  
32

33 §Correspondence: Sangah Shin, Department of Food and Nutrition, Chung-Ang University,  
34  
35 Gyeonggi-do 17546, South Korea. E-mail: ivory8320@cau.ac.kr; Tel.: +82-31-670-3259;  
36  
37 Fax: +82-31-675-1381  
38  
39

40  
41 **ORCID*s***  
42  
43

44  
45 Li-Juan Tan: <https://orcid.org/0000-0002-8970-0884>  
46  
47

48  
49 Su Bin Hwang: <https://orcid.org/0000-0001-7266-3530>  
50  
51

52  
53 Shinyoung Jun: <https://orcid.org/0000-0003-2452-4709>  
54  
55

56  
57 Hyojee Joung: <https://orcid.org/0000-0003-1182-7786>  
58  
59

60  
61 Sangah Shin: <https://orcid.org/0000-0003-0094-1014>  
62

1  
2  
3 20 **Word count:** 3,342 words  
4  
5

6 21 **ABSTRACT**  
7  
8  
9

10 22 **Objectives:** Antioxidants are common dietary compounds with multiple health benefits.  
11  
12 23 This study aimed to identify the association between dietary antioxidant consumption and  
13  
14 24 the incidence of type 2 diabetes mellitus (T2D, defined using the Korean Diabetes  
15  
16 25 Association criteria) in South Korean adults.

17  
18  
19 26 **Design:** Baseline and follow-up data from the Health Examinees (HEXA) study, a large-  
20  
21 27 scale community-based genomic cohort study conducted in South Korea  
22

23 28 **Setting:** A South Korean community  
24

25  
26 29 **Participants:** A total of 20,594 participants, aged 40–79 years, who participated in the  
27  
28 30 baseline and follow-up surveys of the HEXA study were included. After an average of 5  
29  
30 31 years of follow-up, there were 332 men and 360 women with T2D.  
31

32 32 **Results:** Participants with the highest total flavonoid consumption (Q5) had a lower risk of  
33  
34 33 T2D (men: hazard ratio [HR], 0.63; 95% confidence interval [CI], 0.42–0.93; *P* for trend =  
35  
36 34 0.0169]; and women: HR, 0.54; 95% CI, 0.438–0.78; *P* for trend = 0.0001) than those with  
37  
38 35 the lowest consumption (Q1). Dietary total antioxidant capacity was significantly inversely  
39  
40 36 associated with the development of T2D mellitus in women participants alone (HR, 0.58;  
41  
42 37 95% CI, 0.40–0.83; *P* for trend = 0.0004). Stratified analyses according to age and body  
43  
44 38 mass index showed that dietary total flavonoid consumption and total antioxidant capacity  
45  
46 39 had a negative association with the development of T2D in women aged > 52 years and  
47  
48 40 women with BMI > 25 kg/m<sup>2</sup>.  
49  
50  
51  
52

53 41 **Conclusions:** Dietary flavonoid consumption and total antioxidant capacity were associated  
54  
55 42 with a lower risk of T2D in South Korean adults, especially in women aged > 52 years and  
56  
57  
58  
59  
60

1  
2  
3 43 overweight. The findings of this study may provide reference data for the modification of  
4  
5 44 dietary guidelines for South Koreans.  
6  
7  
8

9 **45 Strengths and limitations of the study**

- 10  
11  
12 46 • This study used a large-scale community-based genomic cohort study conducted in  
13  
14 South Korea with 5 years of follow-up.  
15  
16  
17 48 • Stratified analyses were conducted to focus on one certain exposure.  
18  
19 49 • Although this study reported a longitudinal relationship between antioxidant  
20  
21 consumption and diabetes incidence, we could not assess the causality.  
22  
23  
24 51 • Dietary measurement errors were inevitable due to using self-reported FFQ.  
25  
26

27 **52 Keywords:** Cohort study, Diabetes, Dietary antioxidant, Flavonoid, Health Examinees  
28  
29 53 study, South Korean adults, Total antioxidant capacity  
30  
31  
32  
33  
34  
35  
36  
37  
38  
39  
40  
41  
42  
43  
44  
45  
46  
47  
48  
49  
50  
51  
52  
53  
54  
55  
56  
57  
58  
59  
60

## 54 INTRODUCTION

55 Diabetes is a metabolic disease characterized by high blood glucose levels, impaired  
56 glucose tolerance, impaired insulin secretion, and insulin resistance.(1, 2) Currently,  $\geq 400$   
57 million people are living with type 2 diabetes (T2D) mellitus worldwide.(3) The prevalence  
58 of T2D mellitus increases with age. The 2018 Korean Diabetes Association diabetes fact  
59 sheet reported that the prevalence of T2D in the total population aged  $\geq 65$  years was  
60 29.8%.(4) It is projected that T2D will be the seventh leading cause of death by 2030.(3)  
61 Given that T2D is accompanied by various serious complications, including cardiovascular  
62 disease, peripheral vascular disease, retinopathy, nephropathy, neuropathy, and recently,  
63 sarcopenia, its prevention and treatment are extremely important.(3, 5) Both genetic and  
64 environmental factors contribute to the development and progression of T2D mellitus.  
65 However, its growing prevalence is the result of result of changing dietary habits and  
66 lifestyles observed in modern societies.(6)

67 Dietary flavonoids, abundant in fruits and vegetables, are a group of naturally occurring  
68 polyphenolic compounds.(7, 8) There are seven subgroups of flavonoids: flavonols,  
69 flavanones, isoflavones, flavones, flavan-3-ols, anthocyanins, and proanthocyanidins.(9-11)  
70 Flavonoids are associated with various health-promoting effects, including anti-  
71 inflammatory, antihypertensive, anti-obesity, and anti-diabetic.

72 Previous studies have reported that dietary antioxidants decreased oxidative stress, an  
73 important risk factor for T2D, played a key role as anti-inflammatory factors by blocking  
74 the nuclear factor kappa-light-chain-enhancer of the activated B (NF- $\kappa$ B) and mitogen-  
75 activated protein kinase (MAPK) cell signaling pathways. MAPK pathway was associated  
76 with the induction of proinflammatory genes and the promotion of Akt/protein kinase B, an  
77 insulin-signaling pathway.(12-15) As a result, antioxidants improve insulin resistance,

1  
2  
3 78 which is involved in the pathogenesis of T2D mellitus, by promoting the transportation of  
4  
5 79 GLUT4 through the regulation of the insulin-signaling pathway.(16, 17)  
6  
7

8 80 Previous studies have investigated the correlation between dietary antioxidants and  
9  
10 81 obesity, dyslipidemia, and metabolic syndrome.(18-21) Azad et al. (22) showed that a diet  
11  
12 82 high in antioxidants had protective effects against the development of T2D in the Iranian  
13  
14 83 population. However, few studies have been conducted to determine the association between  
15  
16 84 dietary antioxidant intake and T2D in South Korean populations. In addition, whether there  
17  
18 85 is a dose-response relationship between dietary antioxidants and T2D is unclear. It is  
19  
20 86 pertinent to determine whether a relationship exists between dietary antioxidant intake and  
21  
22 87 T2D in South Korean adults. Moreover, the effect of dietary antioxidants on T2D has not  
23  
24 88 been investigated according to the flavonoid subclasses, antioxidant capacities of flavonoids,  
25  
26 89 or total antioxidant capacity (TAC), which is an index to indicate whole dietary antioxidant  
27  
28 90 content.(23) Therefore, we conducted this study to explore the association between dietary  
29  
30 91 antioxidant and the incidence of T2D by analyzing data from the Health Examinees (HEXA)  
31  
32 92 study.  
33  
34  
35  
36  
37  
38  
39  
40  
41

## 42 94 **METHODS**

### 43 44 45 95 **Patient and public involvement**

46  
47  
48 96 Patients and public were not involved in the design of the study.  
49  
50

### 51 97 **Study population**

52  
53  
54 98 This study was based on the baseline and follow-up data from the HEXA study, a large-  
55  
56 99 scale community-based genomic cohort study conducted in South Korea. More specific  
57  
58 100 details of the HEXA study design are described elsewhere.(24) A total of 173,357  
59  
60



1  
2  
3 101 participants aged  $\geq 40$  years were initially included in the baseline survey, which was  
4  
5 102 conducted from 2003 to 2014; 65,642 of these participants were included in the follow-up  
6  
7 103 survey, which was conducted from 2012 to 2016. At baseline, we excluded participants who  
8  
9 104 had T2D mellitus or had no information on fasting plasma glucose or HbA<sub>1C</sub> levels (n =  
10  
11 105 41,311) and those with a history of diseases closely related to T2D mellitus (i.e.,  
12  
13 106 hyperlipidemia, stroke, transient ischemic attacks, angina pectoris, and myocardial  
14  
15 107 infarction) (n = 3,082). At follow-up, we excluded those with missing information on  
16  
17 108 biomarkers for T2D mellitus (fasting plasma glucose, HbA<sub>1C</sub>) (n = 11), those who had an  
18  
19 109 implausible energy intake ( $< 3,349$  or  $\geq 16,743$  kJ/day for men and  $< 2,093$  or  $\geq 14,650$   
20  
21 110 kJ/day for women; n = 630 (25)), and those who were missing values for covariables such  
22  
23 111 as drinking (n = 9) and body mass index (BMI) (n = 5). Ultimately, a total of 20,594  
24  
25 112 participants (6,327 men and 14,267 women) were included in this study.  
26  
27  
28  
29  
30

### 31 **Dietary assessment and estimation of antioxidant components**

32  
33  
34 114 Dietary intake was assessed using the self-administered, 106-item, food frequency  
35  
36 115 questionnaire (FFQ) developed for the Korean Genome Epidemiologic Study.(24)  
37  
38 116 Participants reported the frequencies and average portions of food or beverage items  
39  
40 117 consumed during the last year before participating in the HEXA study. The reproducibility  
41  
42 118 and validity of the FFQ have been assessed in a previous study using a reference method by  
43  
44 119 collecting information on 12-day dietary records.(26) The median correlation coefficient for  
45  
46 120 all nutrients was 0.39 between the FFQ and 12-day dietary record, and the researchers  
47  
48 121 concluded that the FFQ could be an acceptable tool for dietary assessment.(26)  
49  
50  
51  
52

53 122 In this study, we estimated the participants' intake of antioxidant components using  
54  
55 123 self-reported dietary data linked to the TAC database for common South Korean foods.(11,  
56  
57 124 27) Dietary TAC and intake of each flavonoid component were expressed as vitamin C  
58  
59  
60

1  
2  
3 125 equivalent antioxidant capacity (mg VCE/100 g). The intake of individual antioxidant  
4  
5 126 components from a food item was calculated by multiplying the antioxidant component per  
6  
7 127 gram of food item by the total weight in grams of daily intake of this food item. The daily  
8  
9 128 intake of individual total dietary antioxidant components was calculated as the sum of the  
10  
11 129 intake of each antioxidant component from all the food sources reported in the HEXA FFQ  
12  
13 130 data (mg VCE/day). After summing all individual total dietary antioxidant components, we  
14  
15 131 obtained the dietary TAC per person per day.

16  
17  
18  
19  
20 132 Total flavonoid intake was classified into seven categories: anthocyanidins (cyanidin,  
21  
22 133 delphinidin, pelargonidin, malvidin, peonidin, and petunidin), isoflavones (daidzein,  
23  
24 134 genistein, and glycitein), proanthocyanidins (proanthocyanidin-dimer, proanthocyanidin-  
25  
26 135 trimer, proanthocyanidin-4-6mers, proanthocyanidin-7-10mers, and proanthocyanidin-  
27  
28 136 polymers), flavonols (quercetin, kaempferol, myricetin, and isorhamnetin), flavones  
29  
30 137 (luteolin and apigenin), flavanones (eriodictyol, hesperetin, and naringenin), and flavan-3-  
31  
32 138 ols (catechin, epicatechin, epigallocatechin, theaflavin, theaflavin-3-gallate, theaflavin-3'-  
33  
34 139 gallate, and theaflavin-3-3-digallate).

## 35 36 37 38 39 140 **Definition of type 2 diabetes**

40  
41  
42 141 T2D was determined in accordance with the definition provided by the Korean Diabetes  
43  
44 142 Association.(28) T2D was defined as a diagnosis by a physician, increased fasting plasma  
45  
46 143 glucose level  $\geq 6.99$  mmol/L (126 mg/dL), or elevated HbA<sub>1C</sub> level  $\geq 47.5$  mmol/mol (6.5%).  
47  
48

## 49 144 **Covariables**

50  
51  
52 145 In the HEXA study, the sociodemographic information of each participant was  
53  
54 146 collected using a questionnaire. Our covariables of interest included age, BMI, level of  
55  
56 147 education (middle school or lower, high school, or college or higher), and health-related  
57  
58  
59  
60

1  
2  
3 148 behaviors, such as smoking (current smoker, past smoker, or non-smoker), alcohol  
4  
5 149 consumption (never or current drinker), level of physical activity (inactive or active), and  
6  
7  
8 150 total energy intake (kJ/day). BMI was calculated as the quotient of the body weight (kg) and  
9  
10 151 height (m) squared (kg/m<sup>2</sup>).<sup>(29)</sup> Smoking status was categorized into three groups based on  
11  
12 152 the participants' responses to the question, "Have you smoked  $\geq$  20 packs (400 cigarettes)  
13  
14 153 so far?" Participants who answered "never" were classified as "non-smokers," those who  
15  
16 154 answered "yes" and were still smoking at the time of the survey were classified as "current  
17  
18 155 smokers," and those who answered "yes" but had quit smoking at the time of the survey  
19  
20 156 were classified as "past smokers." Alcohol consumption was classified based on the  
21  
22 157 responses to the following question, "Are you unable to drink or refuse to do so for religious  
23  
24 158 or other reasons?" in the HEXA survey. In the present analysis, we classified participants  
25  
26 159 who replied "yes" as "alcohol non-drinkers;" the rest were classified as "alcohol drinkers."  
27  
28  
29 160 Regarding physical activity levels, participants were classified as "active" if they reported  
30  
31 161 that they engaged in exercises resulting in sweating for  $\geq$  30 min twice a week.<sup>(30)</sup>  
32  
33  
34  
35

## 36 162 **Statistical analyses**

37  
38  
39 163 All statistical analyses were sex-stratified and performed using Statistical Analysis  
40  
41 164 Systems software version 9.4 (SAS Institute, Cary, NC, USA). Statistical significance was  
42  
43 165 set at  $P < 0.05$ . Continuous variables were presented as means  $\pm$  standard deviations (SD),  
44  
45 166 and the difference between them in the outcome groups was tested using a generalized linear  
46  
47 167 model (GLM). The categorical variables were presented as numbers (percentages), and the  
48  
49 168 difference between them in the outcome groups was tested using the chi-square test. A  
50  
51 169 multivariable Cox proportional-hazards regression model was used to estimate the hazard  
52  
53 170 ratios (HRs) and 95% confidence intervals (CIs) for T2D after adjusting for categorical  
54  
55 171 (educational level, current drinking status, current smoking status, and physical activity) and  
56  
57  
58  
59  
60

1  
2  
3 172 continuous (age, BMI, and energy intake) covariables. The lowest quintile (Q1) of TAC or  
4  
5 173 flavonoid intake served as a reference group. The median value of each quintile group was  
6  
7  
8 174 modeled as a continuous variable in the Cox model to test the trend. We also estimated the  
9  
10 175 HRs and 95% CIs for an SD increment in dietary TAC and flavonoid intake and conducted  
11  
12 176 stratified analyses according to BMI, age, smoking status, and alcohol consumption. The  
13  
14  
15 177 strata indices for continuous variables (BMI and age) were median value referred to a  
16  
17 178 previous study.(31)

## 179 RESULTS

180 A total of 20,594 individuals (aged 40–79 years) were included in this study. After an  
181 average of 5 years of follow-up, the incidence of T2D mellitus was 5.25% in men and 2.52%  
182 in women. The baseline general characteristics of participants according to quintiles of total  
183 flavonoid intake are shown in Table 1. Among both men and women participants, the highest  
184 consumption group (Q5) included more non-smokers, more participants with higher  
185 education levels, and more participants who engaged in physical activity (all *p* value < 0.05).

186 Table 1. Baseline general characteristics of participants by total flavonoid consumption

|                               | Antioxidant consumption |                  |                  |                  |                  | <i>P</i> -value |
|-------------------------------|-------------------------|------------------|------------------|------------------|------------------|-----------------|
|                               | Q1                      | Q2               | Q3               | Q4               | Q5               |                 |
| Men, n=6327                   |                         |                  |                  |                  |                  |                 |
| Cases / person-years          | 80 / 5103.00            | 74 / 5060.60     | 60 / 4995.40     | 71 / 5110.50     | 47 / 5182.60     |                 |
| Age, years                    | 54.45 ± 8.64            | 54.97 ± 8.51     | 54.20 ± 8.37     | 54.55 ± 8.32     | 54.89 ± 7.97     | 0.0758          |
| BMI, kg/m <sup>2</sup>        | 24.07 ± 2.74            | 24.19 ± 2.73     | 24.21 ± 2.71     | 24.31 ± 2.65     | 24.32 ± 2.58     | 0.1348          |
| Smoking status                |                         |                  |                  |                  |                  | <.0001          |
| Never                         | 357 (28.22%)            | 404 (31.91%)     | 395 (31.27%)     | 373 (29.56%)     | 426 (33.84%)     |                 |
| Past                          | 451 (35.65%)            | 516 (40.76%)     | 549 (43.47%)     | 586 (46.43%)     | 575 (45.67%)     |                 |
| Current                       | 457 (36.13%)            | 346 (27.33%)     | 319 (25.26%)     | 303 (24.01%)     | 258 (20.49%)     |                 |
| Educational level             |                         |                  |                  |                  |                  | <.0001          |
| Under middle school           | 382 (30.32%)            | 297 (23.52%)     | 244 (19.40%)     | 186 (14.77%)     | 135 (10.69%)     |                 |
| High school                   | 503 (39.92%)            | 521 (41.25%)     | 492 (39.11%)     | 504 (40.03%)     | 422 (33.41%)     |                 |
| College or above              | 375 (29.76%)            | 445 (35.23%)     | 522 (41.49%)     | 569 (45.19%)     | 706 (55.90%)     |                 |
| Physical activity             |                         |                  |                  |                  |                  | <.0001          |
| Inactive                      | 1070 (84.65%)           | 1024 (80.95%)    | 999 (79.03%)     | 976 (77.28%)     | 896 (70.94%)     |                 |
| Active                        | 194 (15.35%)            | 241 (19.05%)     | 265 (20.97%)     | 287 (22.72%)     | 367 (29.06%)     |                 |
| Current alcohol consumption   |                         |                  |                  |                  |                  | 0.2578          |
| No                            | 313 (24.74%)            | 337 (26.62%)     | 342 (27.04%)     | 340 (26.86%)     | 364 (28.77%)     |                 |
| Yes                           | 952 (75.26%)            | 929 (73.38%)     | 923 (72.96%)     | 926 (73.14%)     | 901 (71.23%)     |                 |
| Total energy intake, kcal/day | 1624.56 ± 401.00        | 1764.89 ± 417.55 | 1842.23 ± 431.57 | 1926.29 ± 442.88 | 2110.85 ± 499.16 | <.0001          |
| Carbohydrate, E%              | 72.51 ± 7.71            | 71.63 ± 7.10     | 71.00 ± 7.33     | 70.49 ± 6.88     | 70.07 ± 7.09     | <.0001          |
| Protein, E%                   | 12.99 ± 2.41            | 13.33 ± 2.12     | 13.52 ± 2.25     | 13.79 ± 2.26     | 13.97 ± 2.37     | <.0001          |
| Fat, E%                       | 14.50 ± 5.73            | 15.04 ± 5.33     | 15.47 ± 5.48     | 15.73 ± 5.07     | 15.96 ± 5.15     | <.0001          |
| Dietary fiber intake, g/day   | 3.84 ± 1.12             | 4.72 ± 1.24      | 5.28 ± 1.33      | 5.91 ± 1.50      | 7.42 ± 2.14      | <.0001          |
| Total flavonoid, mg VCE/d     | 58.16 ± 15.38           | 97.92 ± 10.58    | 135.76 ± 11.78   | 185.20 ± 18.17   | 299.44 ± 77.77   | <.0001          |
| Anthocyanidins, mg VCE/d      | 11.73 ± 5.14            | 20.53 ± 6.74     | 28.17 ± 9.84     | 37.83 ± 13.24    | 62.90 ± 28.55    | <.0001          |
| Isoflavones, mg VCE/d         | 8.63 ± 4.74             | 11.56 ± 6.30     | 12.24 ± 6.53     | 13.16 ± 6.86     | 15.96 ± 9.48     | <.0001          |
| Proanthocyanidins, mg VCE/d   | 23.59 ± 9.01            | 41.24 ± 10.74    | 59.17 ± 14.68    | 80.74 ± 21.27    | 135.10 ± 47.83   | <.0001          |
| Flavonols, mg VCE/d           | 7.50 ± 4.38             | 10.58 ± 6.08     | 13.18 ± 6.82     | 16.78 ± 9.23     | 24.31 ± 16.28    | <.0001          |

|                               |                      |                      |                      |                      |                      |        |
|-------------------------------|----------------------|----------------------|----------------------|----------------------|----------------------|--------|
| Flavones, mg VCE/d            | 0.29 ± 0.15          | 0.45 ± 0.18          | 0.60 ± 0.22          | 0.79 ± 0.29          | 1.19 ± 0.49          | <.0001 |
| Flavanones, mg VCE/d          | 1.80 ± 1.52          | 3.20 ± 1.96          | 4.56 ± 2.74          | 6.01 ± 3.76          | 10.29 ± 6.33         | <.0001 |
| Flavan-3-ols, mg VCE/d        | 4.63 ± 4.40          | 10.35 ± 9.70         | 17.84 ± 15.94        | 29.88 ± 23.91        | 49.69 ± 37.80        | <.0001 |
| TAC, mg VCE/d                 | 113.96 ± 32.02       | 185.25 ± 30.65       | 252.44 ± 37.18       | 343.26 ± 51.65       | 542.84 ± 149.10      | <.0001 |
| <b>Women, n=14267</b>         |                      |                      |                      |                      |                      |        |
| <b>Cases / person-years</b>   | <b>89 / 11021.20</b> | <b>82 / 11303.30</b> | <b>76 / 11322.20</b> | <b>59 / 11526.80</b> | <b>54 / 11650.80</b> |        |
| Age, years                    | 52.64 ± 8.04         | 52.31 ± 7.84         | 52.19 ± 7.68         | 52.01 ± 7.23         | 52.18 ± 7.02         | 0.0832 |
| BMI, kg/m <sup>2</sup>        | 23.44 ± 3.05         | 23.40 ± 2.93         | 23.32 ± 2.85         | 23.27 ± 2.80         | 23.19 ± 2.72         | 0.8879 |
| Smoking status                |                      |                      |                      |                      |                      | <.0001 |
| Never                         | 2746 (96.32%)        | 2784 (97.72%)        | 2788 (97.82%)        | 2806 (98.39%)        | 2768 (97.23%)        |        |
| Past                          | 31 (1.09%)           | 21 (0.74%)           | 24 (0.84%)           | 21 (0.74%)           | 35 (1.23%)           |        |
| Current                       | 74 (2.60%)           | 44 (1.54%)           | 38 (1.33%)           | 25 (0.88%)           | 44 (1.55%)           |        |
| Educational level             |                      |                      |                      |                      |                      | <.0001 |
| Under middle school           | 1150 (40.41%)        | 977 (34.33%)         | 901 (31.74%)         | 760 (26.73%)         | 625 (22.01%)         |        |
| High school                   | 1236 (43.43%)        | 1305 (45.85%)        | 1297 (45.69%)        | 1368 (48.12%)        | 1341 (47.23%)        |        |
| College or above              | 460 (16.16%)         | 564 (19.82%)         | 641 (22.58%)         | 715 (25.15%)         | 873 (30.75%)         |        |
| Physical activity             |                      |                      |                      |                      |                      | <.0001 |
| Inactive                      | 2449 (85.96%)        | 2355 (82.63%)        | 2294 (80.46%)        | 2239 (78.48%)        | 2120 (74.49%)        |        |
| Active                        | 400 (14.04%)         | 495 (17.37%)         | 557 (19.54%)         | 614 (21.52%)         | 726 (25.51%)         |        |
| Current alcohol consumption   |                      |                      |                      |                      |                      | 0.2756 |
| No                            | 1900 (66.60%)        | 1967 (68.92%)        | 1932 (67.72%)        | 1928 (67.55%)        | 1966 (68.91%)        |        |
| Yes                           | 953 (33.40%)         | 887 (31.08%)         | 921 (32.28%)         | 926 (32.45%)         | 887 (31.09%)         |        |
| Total energy intake, kcal/day | 1429.83 ± 392.78     | 1577.31 ± 420.56     | 1659.22 ± 437.45     | 1761.14 ± 460.69     | 1947.92 ± 497.29     | <.0001 |
| Carbohydrate, E%              | 71.87 ± 8.06         | 71.25 ± 7.93         | 70.67 ± 7.63         | 70.30 ± 7.36         | 69.97 ± 7.30         | <.0001 |
| Protein, E%                   | 13.39 ± 2.47         | 13.59 ± 2.42         | 13.76 ± 2.38         | 13.89 ± 2.33         | 14.01 ± 2.43         | <.0001 |
| Fat, E%                       | 14.74 ± 6.03         | 15.16 ± 5.91         | 15.57 ± 5.65         | 15.81 ± 5.45         | 16.02 ± 5.33         | <.0001 |
| Dietary fiber intake, g/day   | 3.80 ± 1.11          | 4.61 ± 1.21          | 5.13 ± 1.30          | 5.97 ± 1.52          | 7.38 ± 2.10          | <.0001 |
| Total flavonoid, mg VCE/d     | 71.44 ± 17.73        | 116.97 ± 11.49       | 159.39 ± 13.42       | 213.52 ± 19.24       | 333.98 ± 94.24       | <.0001 |
| Anthocyanidins, mg VCE/d      | 15.24 ± 6.21         | 25.89 ± 8.12         | 35.35 ± 11.02        | 46.82 ± 14.12        | 74.77 ± 32.62        | <.0001 |
| Isoflavones, mg VCE/d         | 8.63 ± 4.48          | 10.67 ± 5.74         | 11.70 ± 6.42         | 13.28 ± 7.25         | 15.09 ± 9.07         | <.0001 |
| Proanthocyanidins, mg VCE/d   | 31.11 ± 10.57        | 52.62 ± 11.64        | 73.61 ± 15.79        | 101.51 ± 21.34       | 161.00 ± 54.19       | <.0001 |
| Flavonols, mg VCE/d           | 8.09 ± 4.63          | 11.18 ± 5.92         | 13.54 ± 7.50         | 16.94 ± 9.30         | 24.05 ± 16.19        | <.0001 |
| Flavones, mg VCE/d            | 0.35 ± 0.18          | 0.55 ± 0.23          | 0.71 ± 0.28          | 0.89 ± 0.34          | 1.31 ± 0.62          | <.0001 |
| Flavanones, mg VCE/d          | 2.56 ± 1.91          | 4.37 ± 2.55          | 5.98 ± 3.19          | 7.70 ± 3.84          | 12.62 ± 8.04         | <.0001 |
| Flavan-3-ols, mg VCE/d        | 5.45 ± 4.85          | 11.68 ± 10           | 18.51 ± 14.74        | 26.38 ± 20.18        | 45.13 ± 36.98        | <.0001 |
| TAC (mg VCE/d)                | 135.61 ± 36.42       | 216.26 ± 31.08       | 289.3 ± 38.71        | 380.21 ± 51.07       | 587.77 ± 176.53      | <.0001 |

187 Values are presented as means ± standard deviations or numbers (%). *P*-values were calculated using a  
 188 generalized linear model for continuous variables and Chi-square test for categorical variables. *p*<0.05 are  
 189 shown in bold.

190 Total flavonoid intake was the sum of anthocyanidins, isoflavones, proanthocyanidins, flavonols, flavones,  
 191 flavanones, and flavan-3-ols.

192 Total antioxidant capacity (TAC) was obtained by combining the individual antioxidant capacity of each  
 193 antioxidant derived from every food item. BMI: body mass index, VCE: vitamin C equivalents.

194  
 195 Table 2 shows the range of dietary antioxidant intake by quintiles. The associations  
 196 between dietary antioxidant intake and the HRs of T2D mellitus are presented in Table 3.  
 197 All participants with the highest total dietary flavonoid intake (Q5) had a lower risk of  
 198 developing T2D mellitus (men: HR, 0.63; 95% CI, 0.42–0.93 and women: HR, 0.54; 95%  
 199 CI, 0.38–0.78; both *P* for trend < 0.05) than those with the lowest flavonoid intake (Q1).  
 200 Consumption of more flavonols and proanthocyanidins had a protective effect against the  
 201 development of T2D mellitus in men participants, and consumption of anthocyanidins,  
 202 proanthocyanidins, flavonols, flavones, and flavanones showed a protective effect against  
 203 T2D mellitus in women participants (all *P* for trend < 0.05). After estimation of HRs

204 according to quintiles of TAC, the Q5 group of women participants still showed a lower risk  
 205 of T2D mellitus (HR, 0.58; 95% CI, 0.40–0.83; *P* for trend = 0.0004) than the Q1 group.  
 206 However, although the TAC Q5 group of men participants did not show any significant  
 207 association with T2D mellitus, they had an approximately 15% reduced risk of developing  
 208 T2D mellitus for an SD increment in TAC (HR, 0.85; 95% CI, 0.75–0.96). After further  
 209 adjustment for energy percent from carbohydrate, fat, and protein and dietary fiber intake,  
 210 the results remained largely unchanged (Supplementary Table S1 and Table S2).

211 Table 2. Range of each dietary antioxidant intake by quintile

|                              | Antioxidant consumption |                          |                          |                          |                          |
|------------------------------|-------------------------|--------------------------|--------------------------|--------------------------|--------------------------|
|                              | Q1                      | Q2                       | Q3                       | Q4                       | Q5                       |
| <b>Men</b>                   |                         |                          |                          |                          |                          |
| Total flavonoid (mg VCE/d)   | 58.16 (13.07 – 80.30)   | 97.92 (80.32 – 116.38)   | 135.76 (116.38 – 156.75) | 185.20 (156.80 – 221.23) | 299.44 (221.46 – 378.83) |
| Anthocyanidins (mg VCE/d)    | 9.69 (0.75 – 14.14)     | 17.94 (14.14 – 21.97)    | 26.58 (21.97 – 31.57)    | 38.62 (31.57 – 46.86)    | 68.33 (46.89 – 94.05)    |
| Isoflavones (mg VCE/d)       | 5.07 (0.10 – 6.80)      | 8.07 (6.80 – 9.35)       | 10.78 (9.35 – 12.22)     | 14.16 (12.22 – 16.57)    | 23.48 (16.57 – 30.39)    |
| Proanthocyanidins (mg VCE/d) | 21.28 (1.43 – 31.14)    | 39.10 (31.15 – 47.5)     | 56.93 (47.52 – 67.33)    | 81.94 (67.35 – 99.38)    | 140.58 (99.41 – 181.75)  |
| Flavonols (mg VCE/d)         | 5.25 (0.69 – 7.30)      | 8.81 (7.30 – 10.32)      | 11.89 (10.33 – 13.65)    | 16.14 (13.65 – 19.27)    | 30.25 (19.27 – 43.23)    |
| Flavones (mg VCE/d)          | 0.23 (0.02 – 0.33)      | 0.40 (0.33 – 0.48)       | 0.57 (0.48 – 0.67)       | 0.79 (0.67 – 0.93)       | 1.32 (0.93 – 1.81)       |
| Flavanones (mg VCE/d)        | 1.03 (0.00 – 1.77)      | 2.43 (1.77 – 3.09)       | 3.93 (3.09 – 4.89)       | 6.16 (4.89 – 7.80)       | 12.33 (7.80 – 18.86)     |
| Flavan-3-ols (mg VCE/d)      | 2.98 (0.10 – 4.91)      | 6.82 (4.92 – 8.87)       | 11.79 (8.87 – 15.54)     | 23.54 (15.56 – 41.05)    | 67.26 (41.06 – 111.46)   |
| TAC (mg VCE/d)               | 111.21 (21.57 – 150.38) | 182.54 (150.45 – 215.60) | 251.21 (215.61 – 289.93) | 343.27 (289.98 – 406.09) | 549.53 (406.14 – 711.92) |
| <b>Women</b>                 |                         |                          |                          |                          |                          |
| Total flavonoid (mg VCE/d)   | 71.44 (7.28 – 96.65)    | 116.97 (96.66 – 136.81)  | 159.39 (136.81 – 183.19) | 213.52 (183.20 – 250.56) | 333.98 (250.59 – 417.37) |
| Anthocyanidins (mg VCE/d)    | 12.85 (0.44 – 18.47)    | 23.33 (18.48 – 28.19)    | 34.01 (28.19 – 40.07)    | 47.64 (40.07 – 56.64)    | 80.24 (56.65 – 103.83)   |
| Isoflavones (mg VCE/d)       | 4.83 (0.43 – 6.50)      | 7.73 (6.50 – 8.96)       | 10.31 (8.96 – 11.72)     | 13.67 (11.72 – 16.02)    | 22.83 (16.02 – 31.64)    |
| Proanthocyanidins (mg VCE/d) | 28.89 (2.21 – 41.00)    | 50.74 (41.01 – 60.82)    | 72.48 (60.83 – 84.94)    | 101.70 (84.95 – 121.70)  | 166.05 (121.73 – 210.37) |
| Flavonols (mg VCE/d)         | 5.72 (1.00 – 7.65)      | 9.09 (7.65 – 10.55)      | 12.11 (10.55 – 13.81)    | 16.26 (13.81 – 19.38)    | 30.62 (19.38 – 43.23)    |
| Flavones (mg VCE/d)          | 0.28 (0.01 – 0.39)      | 0.48 (0.39 – 0.57)       | 0.67 (0.57 – 0.77)       | 0.89 (0.77 – 1.05)       | 1.50 (1.05 – 2.05)       |
| Flavanones (mg VCE/d)        | 1.58 (0.00 – 2.58)      | 3.44 (2.58 – 4.35)       | 5.38 (4.35 – 6.55)       | 7.95 (6.55 – 9.73)       | 14.88 (9.73 – 20.03)     |
| Flavan-3-ols (mg VCE/d)      | 3.82 (0.25 – 6.06)      | 8.18 (6.06 – 10.41)      | 13.17 (10.41 – 16.31)    | 21.85 (16.31 – 30.72)    | 60.14 (30.72 – 89.56)    |
| TAC                          | 132.65 (13.04 – 178.98) | 214.39 (178.99 – 248.73) | 287.62 (248.74 – 328.90) | 380.46 (328.94 – 442.53) | 594.04 (442.54 – 745.54) |

212 Values were presented as mean (min–max). TAC: Total antioxidant capacity, VCE: vitamin C equivalents.

213

214

215 Table 3. Hazard ratios of type 2 diabetes mellitus during follow-up according to antioxidant consumption  
216 divided into quintiles, where Q5 represents highest

|                   | Antioxidant consumption |                   |                   |                   |                   | <i>P</i> for trend | HR for an SD increment |
|-------------------|-------------------------|-------------------|-------------------|-------------------|-------------------|--------------------|------------------------|
|                   | Q1                      | Q2                | Q3                | Q4                | Q5                |                    |                        |
| Men               |                         |                   |                   |                   |                   |                    |                        |
| Total flavonoid   | Ref                     | 0.98 (0.71, 1.34) | 0.90 (0.64, 1.26) | 0.91 (0.65, 1.27) | 0.63 (0.42, 0.93) | 0.0169             | 0.85 (0.75, 0.97)      |
| Anthocyanidins    | Ref                     | 0.79 (0.56, 1.11) | 0.99 (0.72, 1.36) | 0.86 (0.62, 1.20) | 0.71 (0.50, 1.03) | 0.1167             | 0.87 (0.77, 0.99)      |
| Isoflavones       | Ref                     | 1.45 (1.03, 2.06) | 1.12 (0.78, 1.60) | 1.19 (0.83, 1.71) | 1.36 (0.94, 1.97) | 0.3151             | 1.05 (0.94, 1.17)      |
| Proanthocyanidins | Ref                     | 1.04 (0.76, 1.44) | 0.97 (0.70, 1.36) | 0.77 (0.54, 1.09) | 0.72 (0.50, 1.05) | 0.0247             | 0.88 (0.77, 0.99)      |
| Flavonols         | Ref                     | 1.49 (1.08, 2.05) | 0.90 (0.63, 1.30) | 0.97 (0.68, 1.38) | 0.82 (0.56, 1.19) | 0.0381             | 0.84 (0.73, 0.97)      |
| Flavones          | Ref                     | 1.01 (0.73, 1.41) | 1.01 (0.72, 1.41) | 0.84 (0.59, 1.20) | 0.85 (0.59, 1.22) | 0.2322             | 0.90 (0.80, 1.01)      |
| Flavanones        | Ref                     | 0.83 (0.59, 1.17) | 1.23 (0.89, 1.68) | 0.94 (0.67, 1.31) | 0.82 (0.57, 1.18) | 0.3313             | 0.94 (0.83, 1.06)      |
| Flavan-3-ols      | Ref                     | 0.89 (0.64, 1.24) | 1.12 (0.81, 1.55) | 0.79 (0.55, 1.12) | 0.75 (0.52, 1.08) | 0.0744             | 0.90 (0.79, 1.01)      |
| TAC               | Ref                     | 1.08 (0.78, 1.49) | 0.95 (0.68, 1.33) | 0.87 (0.62, 1.24) | 0.73 (0.50, 1.06) | 0.0448             | 0.85 (0.75, 0.96)      |
| Women             |                         |                   |                   |                   |                   |                    |                        |
| Total flavonoid   | Ref                     | 0.90 (0.66, 1.22) | 0.82 (0.60, 1.12) | 0.61 (0.44, 0.87) | 0.54 (0.38, 0.78) | 0.0001             | 0.80 (0.70, 0.90)      |
| Anthocyanidins    | Ref                     | 0.91 (0.68, 1.23) | 0.63 (0.45, 0.87) | 0.71 (0.52, 0.99) | 0.56 (0.39, 0.79) | 0.0006             | 0.85 (0.75, 0.97)      |
| Isoflavones       | Ref                     | 0.98 (0.71, 1.34) | 0.71 (0.51, 0.99) | 0.81 (0.58, 1.13) | 0.78 (0.56, 1.10) | 0.1353             | 0.92 (0.82, 1.04)      |
| Proanthocyanidins | Ref                     | 0.90 (0.66, 1.23) | 1.04 (0.77, 1.41) | 0.66 (0.47, 0.93) | 0.50 (0.34, 0.72) | <.0001             | 0.79 (0.70, 0.90)      |
| Flavonols         | Ref                     | 0.83 (0.61, 1.12) | 0.68 (0.49, 0.94) | 0.57 (0.41, 0.80) | 0.61 (0.43, 0.86) | 0.0040             | 0.88 (0.77, 1.00)      |
| Flavones          | Ref                     | 0.81 (0.60, 1.10) | 0.74 (0.54, 1.01) | 0.54 (0.38, 0.76) | 0.56 (0.39, 0.79) | 0.0003             | 0.81 (0.71, 0.93)      |
| Flavanones        | Ref                     | 0.73 (0.54, 0.98) | 0.56 (0.41, 0.77) | 0.57 (0.41, 0.78) | 0.54 (0.39, 0.76) | 0.0005             | 0.83 (0.73, 0.95)      |
| Flavan-3-ols      | Ref                     | 0.83 (0.60, 1.13) | 0.79 (0.57, 1.08) | 0.64 (0.45, 0.90) | 0.79 (0.57, 1.10) | 0.3681             | 0.93 (0.82, 1.05)      |
| TAC               | Ref                     | 0.82 (0.60, 1.11) | 0.86 (0.64, 1.17) | 0.51 (0.36, 0.73) | 0.58 (0.40, 0.83) | 0.0004             | 0.81 (0.71, 0.92)      |

1  
2  
3 217 Results are presented as the hazard ratio (HR) for a standard deviation (SD) increment in dietary antioxidant  
4 218 capacity using a cox model.  
5 219 The multivariable Cox proportional hazards regression model was adjusted for age, body mass index (BMI),  
6 220 educational level, physical activity, drinking status, smoking status, and total energy intake.  
7 221 Total flavonoid intake was the sum of anthocyanidins, isoflavones, proanthocyanidins, flavonols, flavones,  
8 222 flavanones, and flavan-3-ols.  
9 223 Total antioxidant capacity (TAC) was obtained by combining the individual antioxidant capacity of each  
10 224 antioxidant derived from every food item.  
11 225

12  
13  
14 226 We also performed stratified analyses according to age, BMI, drinking status for both  
15  
16 227 sexes, and smoking status for men participants. Figure 1 shows the HRs of T2D mellitus in  
17  
18 228 the Q5 and Q1 groups according to baseline age, baseline BMI, and alcohol drinking status  
19  
20 229 in the HEXA study. There was almost no significant association between T2D mellitus and  
21  
22 230 dietary intake of antioxidant components in men participants. However, total flavonoid  
23  
24 231 intake and dietary TAC showed a protective effect against the development of T2D mellitus  
25  
26 232 in women participants who were aged > 52 years, had a BMI  $\geq$  25 kg/m<sup>2</sup>, and regardless of  
27  
28 233 alcohol consumption.  
29

## 30 31 32 33 234 **Discussion**

34  
35  
36 235 In this study, we discovered that dietary total flavonoid consumption and TAC are both  
37  
38 236 associated with a reduced risk of developing T2D mellitus. After further analysis stratified  
39  
40 237 according to age, and BMI, we found that dietary total flavonoid consumption and TAC had  
41  
42 238 a protective effect against the development of type 2 diabetes mellitus in women participants  
43  
44 239 who were overweight or aged > 52 years.  
45  
46  
47

48 240 Oxidative stress, which is an imbalance between the production of reactive oxygen  
49  
50 241 species (free radicals) and antioxidant defense mechanism, is a risk factor for T2D.(17)  
51  
52 242 Previous studies have shown that oxidative stress impairs the secretion of insulin by  
53  
54 243 pancreatic beta cells and interferes with the insulin signaling pathway, thereby accelerating  
55  
56 244 the development and progression of T2D by increasing insulin resistance.(2, 3, 6, 32, 33)  
57  
58  
59  
60



1  
2  
3 245 Oxidative stress can be regulated by antioxidants, which react with reactive oxygen  
4  
5 246 species.(34) The consumption of dietary flavonoids has been shown to be associated with  
6  
7 247 lower incidences of T2D. Several previous studies have indicated that flavonoids decrease  
8  
9 248 plasma glucose levels and improve lipid profile, insulin secretion, and insulin resistance,  
10  
11 249 factors which are implicated in the development of T2D.(2, 3, 8, 35) In a previous study,  
12  
13 250 higher flavonol intake was associated with a 26% lower incidence of T2D.(36)(35) In  
14  
15 251 addition, the authors observed a marginally significant inverse association between flavan-  
16  
17 252 3-ol intake and the risk of T2D, but there was no association with anthocyanin intake.(36)(35)  
18  
19 253 Knekt et al.(37) reported a marginally significant inverse association between the intake of  
20  
21 254 the flavonols quercetin, and myricetin, but not kaempferol, and the incidence of T2D in  
22  
23 255 Finnish men and women. Quercetin, in particular, is known to decrease plasma glucose  
24  
25 256 concentration, improve insulin concentration, preserve the integrity of pancreatic beta cells,  
26  
27 257 alleviate T2D symptoms, and reduce hepatic gene expression in streptozotocin-induced  
28  
29 258 diabetic models.(38)-Flavan-3-ol and isoflavone intake is associated with a reduced risk of  
30  
31 259 T2D and improved insulin resistance and serum insulin concentrations.(39) Dietary flavone  
32  
33 260 intake is negatively associated with systolic blood pressure, triglyceride level,  
34  
35 261 triglyceride/high-density lipoprotein-cholesterol level, and homeostatic model assessment  
36  
37 262 of insulin resistance. Flavone intake may have some beneficial effects in the reduction of  
38  
39 263 the prevalence of T2D in South Korean women.(8) Consumption of foods rich in  
40  
41 264 anthocyanins, particularly blueberries, apples, and pears, is also inversely associated with  
42  
43 265 the risk of T2D in the United States.(40)

51  
52 266 A key potential mechanism for the protective effect of flavonoids against T2D is the  
53  
54 267 protection of tissues from free oxygen radicals and lipid peroxidation through their  
55  
56 268 antioxidant activity.(41) In addition, anti-inflammatory functions, improvement of

1  
2  
3 269 endothelial functions, reduction of blood cholesterol concentration, and nicotinamide  
4  
5 270 adenine dinucleotide phosphate oxidase activity are also associated with a reduced risk of  
6  
7  
8 271 T2D mellitus.(41) Flavonoids are known to interact with molecular targets and affect NF-  
9  
10 272  $\kappa$ B and MAPK signaling pathways.(42) Furthermore, flavonoids modulate postprandial  
11  
12 273 glucose levels by reducing the activities of digestive enzymes ( $\alpha$ -amylase and  $\alpha$ -glucosidase),  
13  
14 274 decreasing the active transport of glucose across the intestinal brush border membrane, and  
15  
16 275 inhibiting glucose transporters.(32) Antioxidant-rich fruits and vegetables contain relatively  
17  
18 276 high fiber content, which can influence the beneficial effects of antioxidants against T2D.(43)  
19  
20 277 Furthermore, it has been reported that flavonoids inhibit  $\alpha$ -glucosidase activity to alleviate  
21  
22 278 hyperglycemia.(44, 45)  
23  
24  
25  
26

27 279 The effect of each type of flavonoid intake on the risk of T2D varies by sex. In this  
28  
29 280 study, there was a correlation between anthocyanidin and proanthocyanidin intake and the  
30  
31 281 risk of developing T2D in men. However, there was a greater correlation between the risk  
32  
33 282 of T2D and intake of flavonoids, such as anthocyanidins, proanthocyanidins, flavonols,  
34  
35 283 flavones, and flavanones, in women than in men. These sex-specific results are often seen  
36  
37 284 in other phytochemical-related studies. In a previous study conducted using 2008–2011 data  
38  
39 285 from the Korea National Health and Nutrition Examination Survey, a high intake of  
40  
41 286 flavonoids did not reduce the incidence of obesity and abdominal obesity in men but  
42  
43 287 significantly reduced obesity (18%) in women. In addition, high flavonoid intake was  
44  
45 288 reported to reduce the incidence of abdominal obesity (19%) in that study.(2, 46, 47) The  
46  
47 289 variations in these results appear to be due to differences between the dietary intake patterns  
48  
49 290 of South Korean men and women. Sex-specific dietary patterns have been reported in  
50  
51 291 previous studies; namely, men consume the recommended amount of vegetables more than  
52  
53 292 women, whereas women consume the recommended amount of fruit more than men.(48) In  
54  
55  
56  
57  
58  
59  
60

1  
2  
3 293 addition, women generally consume higher amounts of dietary antioxidants than men.(2, 49)  
4  
5 294 Higher intake of dietary antioxidants can induce high plasma concentrations of antioxidants  
6  
7 295 and more beneficial effects on preventing development of T2D. Furthermore, gonadal  
8  
9 296 hormones (menopausal estrogen and testosterone) have been implicated in sex-specific  
10  
11 297 differences in glucose homeostasis.(50) Healthy women have lower skeletal muscle mass,  
12  
13 298 higher adipose tissue mass, more circulating free fatty acids, and higher intramyocellular  
14  
15 299 lipid content than men of the same age. These are all factors that could promote increased  
16  
17 300 insulin resistance in women compared with men.(50)  
18  
19  
20  
21

22 301 Various factors, such as age and lifestyle, are known to contribute to the development  
23  
24 302 and progression of T2D.(17) The prevalence of T2D in South Koreans increases rapidly with  
25  
26 303 age.(4) Unhealthy lifestyle habits, such as smoking, excessive alcohol consumption, and  
27  
28 304 inactivity, are known to contribute to the development of diabetes.(3, 51) We found that men  
29  
30 305 with T2D were older and more likely to be current drinkers and current smokers than those  
31  
32 306 without diabetes. However, our stratified analysis showed that there was no correlation  
33  
34 307 between these factors except for current alcohol consumption. On the other hand, women  
35  
36 308 with T2D were significantly older and had significantly higher BMI than those without  
37  
38 309 diabetes. Furthermore, the stratified analysis showed that antioxidant consumption was  
39  
40 310 inversely related to the HR of T2D in older women (> 52 years), women with a BMI > 25  
41  
42 311 kg/m<sup>2</sup>, regardless of alcohol consumption. Although it is difficult to fully explain these  
43  
44 312 variations in South Korean adults, these findings suggest that high antioxidant intake may  
45  
46 313 be related to a decreased risk of T2D, especially in women with specific lifestyle habits.  
47  
48  
49  
50  
51

### 52 314 **Strengths and limitations**

53  
54  
55 315 The main strength of this study was that it was conducted using a large-scale  
56  
57 316 community-based genomic cohort study with 5 years of follow-up on average. Stratified  
58  
59  
60

1  
2  
3 317 analyses were conducted in the current study to focus on one certain exposure. This study  
4  
5 318 had some limitations. First, although this study reported a longitudinal relationship between  
6  
7 319 dietary antioxidant consumption and T2D incidence, we did not assess the causality. Second,  
8  
9 320 we obtained dietary information and information on the intake of antioxidant components  
10  
11 321 using self-reported FFQ; thus, dietary measurement errors were inevitable. However, the  
12  
13 322 106-item FFQ has been previously verified.(26) In addition, further studies are needed to  
14  
15 323 measure the flavonoid concentration to verify the data. Third, we did not quantify the  
16  
17 324 amount of alcohol consumption and smoking. Nevertheless, we found no association  
18  
19 325 between smoking status and T2D after stratification analyses. Dietary antioxidants showed  
20  
21 326 a protective effect against the development of T2D only in women who were non-drinkers.  
22  
23  
24  
25  
26

## 27 **Conclusions**

28  
29 328 The findings of this large-scale prospective cohort study suggest that dietary  
30  
31 329 antioxidant consumption is associated with a lower risk of T2D in South Korean adults. The  
32  
33 330 findings of this study can serve as a reference or guide for the modification of food intake  
34  
35 331 recommendations in dietary guideline policies in South Korea. However, further studies are  
36  
37 332 needed to validate the results of this study.  
38  
39  
40  
41  
42  
43  
44

## 45 **Declarations**

## 48 **Ethics approval and consent to participate**

49  
50 336 All participants voluntarily signed an informed written consent form before enrollment.  
51  
52 337 This study was performed in accordance with the guidelines specified in the Declaration of  
53  
54 338 Helsinki, and the study protocol was approved by the local Institutional Review Board (IRB)  
55  
56  
57  
58  
59  
60

1  
2  
3 339 of the Ethics Committee of the Korean Genome and Epidemiology Study of the Korea  
4  
5 340 National Institute of Health (IRB no. 2014-08-02-3C-A).  
6  
7  
8  
9 341

10  
11 342 **Consent for publication**  
12  
13

14 343 Not applicable.  
15  
16  
17 344

18  
19  
20 345 **Availability of data and materials**  
21  
22

23 346 The data that support the findings of this study are available from the National  
24  
25 347 Genome Research Institute, Korea Centers for Disease Control and Prevention. How  
26  
27 348 ever, restrictions apply to the availability of these data, which were used under lice  
28  
29 349 nse for this study, and as such are not publicly available. Data are however availa  
30  
31 350 ble from the authors upon reasonable request and with permission of the National  
32  
33 351 Genome Research Institute, Korea Centers for Disease Control and Prevention.  
34  
35  
36  
37  
38 352

39  
40  
41 353 **Competing interests**  
42  
43

44 354 The authors declare that they have no competing interests.  
45  
46  
47 355

48  
49 356 **Funding**  
50  
51

52 357 This research was supported by the National Research Foundation of Korea (NRF) grant  
53  
54 358 funded by the Korea government (MSIT) (No.2020R1C1C1014286). MSIT: Ministry of  
55  
56 359 Science and ICT. The study sponsor/funder was not involved in the design of the study; the  
57  
58  
59  
60

1  
2  
3 360 collection, analysis, and interpretation of data; writing the report; and did not impose any  
4  
5 361 restrictions regarding the publication of the report. This research was supported by the  
6  
7 362 Chung-Ang University Young Scientist Scholarship (CAYSS) in 2021.  
8  
9  
10  
11 363  
12  
13  
14 364  
15  
16  
17 365 **Authors' contributions**  
18  
19  
20 366 S.S. supervised the project. S.S. contributed to the conceptualization or design of this  
21  
22 367 study. S.J. and H.J. were contributed to establish the antioxidants database. L.J.T  
23  
24 368 conducted the formal analysis. S.S. verified and validated the outcomes. L.J.T and S.B.H.  
25  
26 369 co-wrote the first draft of the manuscript. S.J. and H.J. reviewed and revised the article  
27  
28 370 critically. All authors approved the final version of the article for publication. S.S. and  
29  
30 371 L.J.T had full access to all the data in the study and take full responsibility for the integrity  
31  
32 372 of the data and accuracy of the data analysis.  
33  
34  
35  
36 373  
37  
38  
39 374 **Acknowledgments**  
40  
41  
42 375 This study was performed using data from the HEXA study, which was suppor  
43  
44 376 ted by the National Genome Research Institute, Korea Centers for Disease Control  
45  
46 377 and Prevention.  
47  
48  
49  
50 378  
51  
52  
53  
54  
55  
56  
57  
58  
59  
60

379 **References**

- 380 1. Bacanlı M., Dilsiz S. A., Başaran N., Başaran A. A. Effects of phytochemicals against  
381 diabetes. *Advances in Food and Nutrition Research* 2019; 89: 209-238.
- 382 2. Yeon JY, Bae YJ, Kim EY, Lee EJ. Association between flavonoid intake and diabetes  
383 risk among the Koreans. *Clin Chim Acta* 2015; 439: 225-230.
- 384 3. Quansah DY, Ha K, Jun S, et al. Associations of dietary antioxidants and risk of type 2  
385 diabetes: data from the 2007–2012 Korea National Health and Nutrition Examination  
386 Survey. *Molecules* 2017; 22(10): 1664.
- 387 4. Kim BY, Won JC, Lee JH, et al. Diabetes Fact Sheets in Korea, 2018: An Appraisal of  
388 Current Status. *Diabetes Metab J* 2019; 43(4): 487-494.
- 389 5. Kim DH, Yu TY. Diabetes and Sarcopenia. *J Korean Diabetes* 2017; 18(4): 239-247.
- 390 6. Burton-Freeman B., Brzeziński M., Park E., et al. A selective role of dietary  
391 anthocyanins and flavan-3-ols in reducing the risk of type 2 diabetes mellitus: a review  
392 of recent evidence. *Nutrients* 2019; 11(4): 841.
- 393 7. Girish Sharma, Dhan Prakash, Charu Gupta, *Phytochemicals of nutraceutical*  
394 *importance: do they defend against diseases*, in *Phytochemicals of nutraceutical*  
395 *importance*, Prakash D. and Sharma G., Editors. 2014, CABI, Nosworthy Way. p. 1-24.  
396 10.1079/9781780643632.0001.
- 397 8. Oh JS, Kim H, Vijayakumar A, et al. Association of dietary flavonoid intake with  
398 prevalence of type 2 diabetes mellitus and cardiovascular disease risk factors in Korean  
399 women aged  $\geq$  30 years. *J Nutr Sci Vitaminol (Tokyo)* 2017; 63(1): 51-58.
- 400 9. Kawser Hossain M, Abdal Dayem A, Han J, et al. Molecular mechanisms of the anti-  
401 obesity and anti-diabetic properties of flavonoids. *Int J Mol Sci* 2016; 17(4): 569.
- 402 10. Panche AN, Diwan AD, Chandra SR. Flavonoids: an overview. *J Nutr Sci* 2016; 5: e47.

- 1  
2  
3 403 11. Jun S., Shin S., Joung H. Estimation of dietary flavonoid intake and major food sources  
4  
5 404 of Korean adults. *Br J Nutr* 2016; 115(3): 480-489.  
6  
7  
8 405 12. Jafari Azad B., Yaseri M., Daneshzad E., Koohdani F. Interaction between Apo A-II -  
9  
10 406 265T>C polymorphism and dietary total antioxidant capacity on some anthropometric  
11  
12 407 indices and serum lipid profile in patients with type 2 diabetes mellitus. *J Nutr Sci* 2021;  
13  
14 408 10: e9.  
15  
16  
17 409 13. Qi S., Xin Y., Guo Y., et al. Ampelopsin reduces endotoxic inflammation via repressing  
18  
19 410 ROS-mediated activation of PI3K/Akt/NF-kappaB signaling pathways. *Int*  
20  
21 411 *Immunopharmacol* 2012; 12(1): 278-87.  
22  
23  
24 412 14. Arulsevan P., Fard M. T., Tan W. S., et al. Role of Antioxidants and Natural Products  
25  
26 413 in Inflammation. *Oxid Med Cell Longev* 2016; 2016: 5276130.  
27  
28  
29 414 15. Ramachandran V., Saravanan R. Glucose uptake through translocation and activation of  
30  
31 415 GLUT4 in PI3K/Akt signaling pathway by asiatic acid in diabetic rats. *Hum Exp Toxicol*  
32  
33 416 2015; 34(9): 884-93.  
34  
35  
36 417 16. Li SS, Wu J, Chen LG, et al. Biogenesis of C-glycosyl flavones and profiling of  
37  
38 418 flavonoid glycosides in lotus (*Nelumbo nucifera*). *PLoS One* 2014; 9(10): e108860.  
39  
40 419 17. Halim M., Halim A. The effects of inflammation, aging and oxidative stress on the  
41  
42 420 pathogenesis of diabetes mellitus (type 2 diabetes). *Diabetes & Metabolic Syndrome:*  
43  
44 421 *Clinical Research & Reviews*, 2019; 13(2): 1165-1172.  
45  
46  
47 422 18. Kim SA, Kim J, Jun S, et al. Association between dietary flavonoid intake and obesity  
48  
49 423 among adults in Korea. *Appl Physiol Nutr Metab* 2020; 45(2): 203-212.  
50  
51  
52 424 19. Kim SA, Joung H, Shin S. Dietary pattern, dietary total antioxidant capacity, and  
53  
54 425 dyslipidemia in Korean adults. *Nutr J* 2019; 18(1): 37.  
55  
56 426 20. Park S, Ham JO, Lee BK. Effects of total vitamin A, vitamin C, and fruit intake on risk  
57  
58 427 for metabolic syndrome in Korean women and men. *Nutrition* 2015; 31(1): 111-118.  
59  
60



- 1  
2  
3 428 21. Kim S, Song Y, Lee JE, et al. Total antioxidant capacity from dietary supplement  
4  
5 429 decreases the likelihood of having metabolic syndrome in Korean adults. *Nutrients* 2017;  
6  
7 430 9(10): 1055.  
8  
9  
10 431 22. Jafari Azad B., Yaseri M., Daneshzad E., Koohdani F. Interaction between Apo A-II -  
11  
12 432 265T > C polymorphism and dietary total antioxidant capacity on some oxidative stress  
13  
14 433 and inflammatory markers in patients with type 2 diabetes mellitus. *Br J Nutr* 2021: 1-  
15  
16 434 17.  
17  
18  
19 435 23. Daneshzad E., Keshavarz S. A., Qorbani M., Larijani B., Azadbakht L. Dietary total  
20  
21 436 antioxidant capacity and its association with sleep, stress, anxiety, and depression score:  
22  
23 437 A cross-sectional study among diabetic women. *Clin Nutr ESPEN* 2020; 37: 187-194.  
24  
25  
26 438 24. Health Examinees Study Group. The Health Examinees (HEXA) study: rationale, study  
27  
28 439 design and baseline characteristics. *Asian Pac J Cancer Prev* 2015; 16(4): 1591-1597.  
29  
30  
31 440 25. Shin S, Lim J, Lee HW, et al. Association between the prevalence of metabolic syndrome  
32  
33 441 and coffee consumption among Korean adults: results from the Health Examinees study.  
34  
35 442 *Appl Physiol Nutr Metab* 2019; 44(12): 1371-1378.  
36  
37  
38 443 26. Ahn Y., Kwon E., Shim J. E., et al. Validation and reproducibility of food frequency  
39  
40 444 questionnaire for Korean genome epidemiologic study. *Eur J Clin Nutr* 2007; 61(12):  
41  
42 445 1435-41.  
43  
44  
45 446 27. Jun S, Chun OK, Joung H. Estimation of dietary total antioxidant capacity of Korean  
46  
47 447 adults. *Eur J Nutr* 2018; 57(4): 1615-1625.  
48  
49  
50 448 28. Ko S. H., Kim S. R., Kim D. J., et al. 2011 clinical practice guidelines for type 2 diabetes  
51  
52 449 in Korea. *Diabetes Metab J* 2011; 35(5): 431-436.  
53  
54  
55 450 29. Korea Disease Control and Prevention Agency. Obesity.  
56  
57 451 [https://health.kdca.go.kr/healthinfo/biz/health/gnrlzHealthInfo/gnrlzHealthInfo/gnrlzHe](https://health.kdca.go.kr/healthinfo/biz/health/gnrlzHealthInfo/gnrlzHealthInfo/gnrlzHealthInfoView.do)  
58  
59 452 [althInfoView.do](https://health.kdca.go.kr/healthinfo/biz/health/gnrlzHealthInfo/gnrlzHealthInfo/gnrlzHealthInfoView.do). Published 15 July 2021. Accessed 2021.06.01.  
60

- 1  
2  
3 453 30. Shin S, Lee HW, Kim CE, et al. Egg Consumption and Risk of Metabolic Syndrome in  
4  
5 454 Korean Adults: Results from the Health Examinees Study. *Nutrients* 2017; 9(7): 687.  
6  
7  
8 455 31. Ratjen I., Schafmayer C., Enderle J., et al. Health-related quality of life in long-term  
9  
10 456 survivors of colorectal cancer and its association with all-cause mortality: a German  
11  
12 457 cohort study. *BMC Cancer* 2018; 18(1): 1156.  
13  
14  
15 458 32. Chen J, Mangelinckx S, Adams A, et al. Natural flavonoids as potential herbal  
16  
17 459 medication for the treatment of diabetes mellitus and its complications. *Natural Product*  
18  
19 460 *Communications* 2015; 10(1): 187-200.  
20  
21  
22 461 33. Rehman K., Akash M.S.H. Mechanisms of inflammatory responses and development of  
23  
24 462 insulin resistance: how are they interlinked? *J Biomed Sci* 2016; 23(1): 87.  
25  
26 463 34. Ham D, Jun S, Kang M, et al. Consumption of Korean Foods with High Flavonoid  
27  
28 464 Contents Reduces the Likelihood of Having Elevated C-Reactive Protein Levels: Data  
29  
30 465 from the 2015–2017 Korea National Health and Nutrition Examination Survey.  
31  
32 466 *Nutrients* 2019; 11(10): 2370.  
33  
34  
35 467 35. Liu YJ, Zhan J, Liu XL, et al. Dietary flavonoids intake and risk of type 2 diabetes: a  
36  
37 468 meta-analysis of prospective cohort studies. *Clin Nutr* 2014; 33(1): 59-63.  
38  
39  
40 469 36. Jacques P. F., Cassidy A., Rogers G., et al. Higher dietary flavonol intake is associated  
41  
42 470 with lower incidence of type 2 diabetes. *J Nutr* 2013; 143(9): 1474-80.  
43  
44  
45 471 37. Knekt P., Kumpulainen J., Jarvinen R., et al. Flavonoid intake and risk of chronic  
46  
47 472 diseases. *Am J Clin Nutr* 2002; 76(3): 560-8.  
48  
49  
50 473 38. Dhanya R. Quercetin for managing type 2 diabetes and its complications, an insight into  
51  
52 474 multitarget therapy. *Biomed Pharmacother* 2022; 146: 112560.  
53  
54  
55 475 39. Curtis P. J., Sampson M., Potter J., et al. Chronic ingestion of flavan-3-ols and  
56  
57 476 isoflavones improves insulin sensitivity and lipoprotein status and attenuates estimated  
58  
59  
60

- 1  
2  
3 477 10-year CVD risk in medicated postmenopausal women with type 2 diabetes: a 1-year,  
4  
5 478 double-blind, randomized, controlled trial. *Diabetes Care* 2012; 35(2): 226-32.  
6  
7  
8 479 40. Reiland H., Slavin J. Systematic Review of Pears and Health. *Nutr Today* 2015; 50(6):  
9  
10 480 301-305.  
11  
12 481 41. Hussain T., Tan B., Murtaza G., et al. Flavonoids and type 2 diabetes: Evidence of  
13  
14 482 efficacy in clinical and animal studies and delivery strategies to enhance their therapeutic  
15  
16 483 efficacy. *Pharmacol Res* 2020; 152: 104629.  
17  
18  
19 484 42. Mansuri M. L., Parihar P., Solanki I., Parihar M. S. Flavonoids in modulation of cell  
20  
21 485 survival signalling pathways. *Genes Nutr* 2014; 9(3): 400.  
22  
23  
24 486 43. Wang PY, Fang JC, Gao ZH, Zhang C, SY. Xie. Higher intake of fruits, vegetables or  
25  
26 487 their fiber reduces the risk of type 2 diabetes: A meta-analysis. *J Diabetes Investig* 2016;  
27  
28  
29 488 7(1): 56-69.  
30  
31  
32 489 44. Li YQ, Zhou FC, Gao F, Bian JS, Shan F. Comparative evaluation of quercetin,  
33  
34 490 isoquercetin and rutin as inhibitors of  $\alpha$ -glucosidase. *J Agric Food Chem* 2009; 57(24):  
35  
36 491 11463-11468.  
37  
38  
39 492 45. Liu S, Li D, Huang B, et al. Inhibition of pancreatic lipase,  $\alpha$ -glucosidase,  $\alpha$ -amylase,  
40  
41 493 and hypolipidemic effects of the total flavonoids from *Nelumbo nucifera* leaves. *J*  
42  
43 494 *Ethnopharmacol* 2013; 149(1): 263-269.  
44  
45  
46 495 46. Wedick NM, Pan A, Cassidy A, et al. Dietary flavonoid intakes and risk of type 2  
47  
48 496 diabetes in US men and women. *Am J Clin Nutr* 2012; 95(4): 925-933.  
49  
50  
51 497 47. Im J, Kim M, Park K. Association between the Phytochemical Index and Lower  
52  
53 498 Prevalence of Obesity/Abdominal Obesity in Korean Adults. *Nutrients* 2020; 12(8):  
54  
55 499 2312.  
56  
57  
58  
59  
60

- 1  
2  
3 500 48. Lee HS, Cho YH, Park J, Shin HR, Sung MK. Dietary intake of phytonutrients in relation  
4  
5 501 to fruit and vegetable consumption in Korea. *J Acad Nutr Diet* 2013; 113(9): 1194-1199.  
6  
7 502 49. Kim YJ, Park MY, Chang N, Kwon O. Intake and major sources of dietary flavonoid in  
8  
9 503 Korean adults: Korean National Health and Nutrition Examination Survey 2010-2012.  
10  
11 504 *Asia Pac J Clin Nutr* 2015; 24(3): 456-463.  
12  
13 505 50. Mauvais-Jarvis F Gender differences in glucose homeostasis and diabetes. *Physiol*  
14  
15 506 *Behav* 2018; 187: 20-23.  
16  
17 507 51. American Diabetes Association. Nutrition recommendations and interventions for  
18  
19 508 diabetes: a position statement of the American Diabetes Association. *Diabetes Care* 2008;  
20  
21 509 31(Supplement 1): S61-S78.  
22  
23  
24  
25  
26  
27  
28  
29

## 30 **Figure Legend**

31  
32 **Figure 1.** Hazard ratios (HR) with 95% confidence intervals (CIs) for type 2 diabetes  
33  
34 mellitus after comparison of antioxidant consumption in the Q5 and Q1 groups according to  
35  
36 baseline age, baseline body mass index (BMI), alcohol consumption, smoking status in the  
37  
38 Health Examinees study. TAC: total antioxidant capacity  
39  
40

41  
42 516  
43  
44  
45  
46  
47  
48  
49  
50  
51  
52  
53  
54  
55  
56  
57  
58  
59  
60

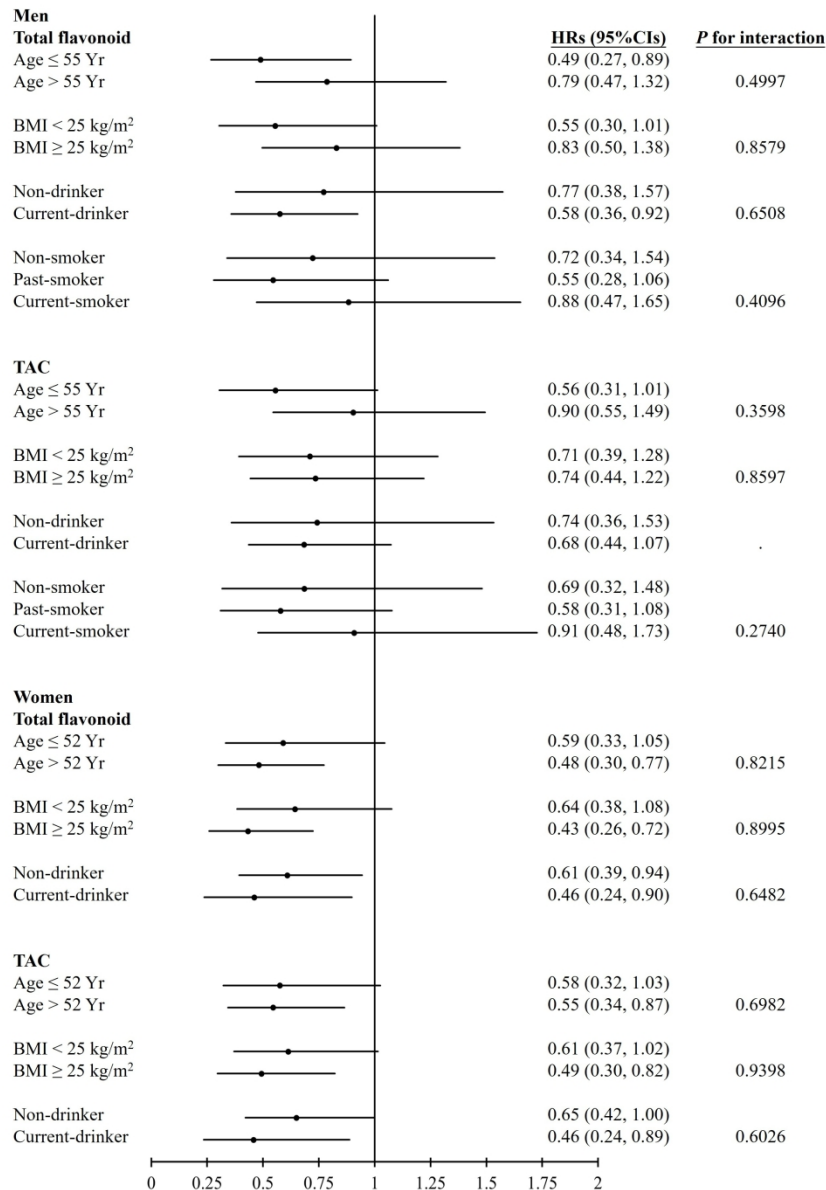

202x277mm (330 x 330 DPI)

**Table S1. Hazard ratios of type 2 diabetes during follow-up according to quintile of cumulative average antioxidant consumption in model 2**

|                   | Antioxidant consumption |                   |                   |                   |                   | <i>P</i> for trend | HR for a SD increment |
|-------------------|-------------------------|-------------------|-------------------|-------------------|-------------------|--------------------|-----------------------|
|                   | Q1                      | Q2                | Q3                | Q4                | Q5                |                    |                       |
| <b>Men</b>        |                         |                   |                   |                   |                   |                    |                       |
| Total flavonoid   | Ref                     | 0.97 (0.71, 1.34) | 0.89 (0.63, 1.25) | 0.89 (0.64, 1.24) | 0.62 (0.42, 0.92) | 0.0136             | 0.85 (0.75, 0.97)     |
| Anthocyanidins    | Ref                     | 0.78 (0.56, 1.10) | 0.98 (0.71, 1.35) | 0.85 (0.61, 1.19) | 0.70 (0.49, 1.01) | 0.0994             | 0.87 (0.76, 0.99)     |
| Isoflavones       | Ref                     | 1.44 (1.01, 2.04) | 1.10 (0.76, 1.59) | 1.18 (0.81, 1.70) | 1.32 (0.90, 1.95) | 0.4245             | 1.04 (0.92, 1.17)     |
| Proanthocyanidins | Ref                     | 1.04 (0.76, 1.44) | 0.97 (0.70, 1.36) | 0.77 (0.54, 1.09) | 0.72 (0.50, 1.04) | 0.0226             | 0.87 (0.77, 0.99)     |
| Flavonols         | Ref                     | 1.46 (1.06, 2.00) | 0.88 (0.61, 1.27) | 0.93 (0.64, 1.33) | 0.77 (0.52, 1.14) | 0.0218             | 0.82 (0.71, 0.95)     |
| Flavones          | Ref                     | 1.00 (0.72, 1.38) | 1.00 (0.71, 1.40) | 0.82 (0.57, 1.17) | 0.83 (0.57, 1.21) | 0.1941             | 0.89 (0.79, 1.01)     |
| Flavanones        | Ref                     | 0.83 (0.59, 1.17) | 1.21 (0.88, 1.67) | 0.93 (0.66, 1.30) | 0.81 (0.56, 1.16) | 0.2998             | 0.93 (0.83, 1.05)     |
| Flavan-3-ols      | Ref                     | 0.88 (0.63, 1.23) | 1.11 (0.80, 1.54) | 0.78 (0.55, 1.11) | 0.74 (0.51, 1.08) | 0.0719             | 0.89 (0.79, 1.01)     |
| TAC               | Ref                     | 1.07 (0.77, 1.47) | 0.94 (0.67, 1.31) | 0.85 (0.59, 1.20) | 0.71 (0.48, 1.05) | 0.0347             | 0.84 (0.74, 0.96)     |
| <b>Women</b>      |                         |                   |                   |                   |                   |                    |                       |
| Total flavonoid   | Ref                     | 0.92 (0.68, 1.24) | 0.84 (0.62, 1.15) | 0.63 (0.45, 0.89) | 0.55 (0.38, 0.80) | 0.0002             | 0.80 (0.71, 0.91)     |
| Anthocyanidins    | Ref                     | 0.92 (0.68, 1.24) | 0.64 (0.46, 0.89) | 0.72 (0.52, 1.00) | 0.56 (0.39, 0.80) | 0.0007             | 0.86 (0.75, 0.97)     |
| Isoflavones       | Ref                     | 0.99 (0.72, 1.35) | 0.72 (0.51, 1.02) | 0.84 (0.60, 1.17) | 0.83 (0.58, 1.18) | 0.2885             | 0.94 (0.84, 1.07)     |
| Proanthocyanidins | Ref                     | 0.92 (0.67, 1.25) | 1.07 (0.79, 1.45) | 0.67 (0.48, 0.95) | 0.51 (0.35, 0.74) | <.0001             | 0.79 (0.70, 0.90)     |
| Flavonols         | Ref                     | 0.85 (0.62, 1.15) | 0.69 (0.50, 0.96) | 0.59 (0.42, 0.83) | 0.62 (0.44, 0.89) | 0.0066             | 0.89 (0.78, 1.02)     |
| Flavones          | Ref                     | 0.82 (0.60, 1.11) | 0.75 (0.55, 1.03) | 0.54 (0.38, 0.77) | 0.57 (0.40, 0.81) | 0.0004             | 0.82 (0.71, 0.93)     |
| Flavanones        | Ref                     | 0.74 (0.55, 1.00) | 0.57 (0.41, 0.79) | 0.58 (0.42, 0.80) | 0.55 (0.40, 0.77) | 0.0008             | 0.84 (0.73, 0.96)     |
| Flavan-3-ols      | Ref                     | 0.84 (0.62, 1.15) | 0.81 (0.59, 1.12) | 0.66 (0.47, 0.92) | 0.81 (0.58, 1.13) | 0.4157             | 0.93 (0.82, 1.06)     |
| TAC               | Ref                     | 0.84 (0.62, 1.14) | 0.89 (0.65, 1.21) | 0.53 (0.37, 0.75) | 0.60 (0.42, 0.86) | 0.0007             | 0.81 (0.71, 0.93)     |

The multivariable Cox proportional-hazards regression model was adjusted for age, body mass index (BMI), educational level, physical activity, alcohol consumption, smoking status, total energy intake, energy percent from carbohydrate, energy percent from protein, and energy percent from fat.

Total flavonoid intake was the sum of anthocyanidins, isoflavones, proanthocyanidins, flavonols, flavones, flavanones, and flavan-3-ols.

Total antioxidant capacity (TAC) was obtained by combining the individual antioxidant capacity of each antioxidant derived from every food item.

**Table S2. Hazard ratios of type 2 diabetes during follow-up according to quintile of cumulative average antioxidant consumption in model 3**

|                   | Antioxidant consumption |                   |                   |                   |                   | <i>P</i> for trend | HR for a SD increment |
|-------------------|-------------------------|-------------------|-------------------|-------------------|-------------------|--------------------|-----------------------|
|                   | Q1                      | Q2                | Q3                | Q4                | Q5                |                    |                       |
| <b>Men</b>        |                         |                   |                   |                   |                   |                    |                       |
| Total flavonoid   | Ref                     | 1.00 (0.72, 1.39) | 0.94 (0.66, 1.34) | 0.98 (0.68, 1.40) | 0.71 (0.45, 1.13) | 0.1553             | 0.89 (0.76, 1.04)     |
| Anthocyanidins    | Ref                     | 0.82 (0.58, 1.15) | 1.06 (0.76, 1.47) | 0.96 (0.67, 1.37) | 0.85 (0.56, 1.30) | 0.6471             | 0.92 (0.79, 1.08)     |
| Isoflavones       | Ref                     | 1.53 (1.08, 2.18) | 1.22 (0.84, 1.76) | 1.31 (0.90, 1.89) | 1.61 (1.09, 2.38) | 0.0731             | 1.12 (0.99, 1.26)     |
| Proanthocyanidins | Ref                     | 1.06 (0.77, 1.46) | 1.02 (0.72, 1.43) | 0.83 (0.58, 1.20) | 0.81 (0.54, 1.22) | 0.1640             | 0.92 (0.79, 1.06)     |
| Flavonols         | Ref                     | 1.54 (1.12, 2.13) | 0.96 (0.66, 1.39) | 1.05 (0.72, 1.54) | 0.97 (0.62, 1.52) | 0.3271             | 0.88 (0.74, 1.05)     |
| Flavones          | Ref                     | 1.06 (0.76, 1.48) | 1.09 (0.77, 1.54) | 0.95 (0.65, 1.38) | 1.07 (0.69, 1.65) | 0.9493             | 0.96 (0.83, 1.11)     |
| Flavanones        | Ref                     | 0.85 (0.61, 1.21) | 1.29 (0.94, 1.79) | 1.03 (0.73, 1.47) | 0.95 (0.64, 1.40) | 0.8985             | 0.98 (0.87, 1.11)     |
| Flavan-3-ols      | Ref                     | 0.93 (0.66, 1.29) | 1.19 (0.86, 1.66) | 0.85 (0.59, 1.23) | 0.84 (0.57, 1.23) | 0.2206             | 0.92 (0.81, 1.05)     |
| TAC               | Ref                     | 1.13 (0.81, 1.57) | 1.02 (0.71, 1.45) | 0.98 (0.67, 1.44) | 0.88 (0.55, 1.40) | 0.3967             | 0.88 (0.75, 1.04)     |
| <b>Women</b>      |                         |                   |                   |                   |                   |                    |                       |
| Total flavonoid   | Ref                     | 0.90 (0.66, 1.23) | 0.82 (0.59, 1.13) | 0.62 (0.43, 0.89) | 0.54 (0.35, 0.83) | 0.0015             | 0.79 (0.68, 0.93)     |
| Anthocyanidins    | Ref                     | 0.93 (0.69, 1.25) | 0.64 (0.46, 0.90) | 0.73 (0.52, 1.04) | 0.58 (0.39, 0.86) | 0.0054             | 0.88 (0.77, 1.02)     |
| Isoflavones       | Ref                     | 1.01 (0.74, 1.39) | 0.75 (0.53, 1.06) | 0.88 (0.63, 1.23) | 0.89 (0.62, 1.27) | 0.4969             | 0.97 (0.86, 1.10)     |
| Proanthocyanidins | Ref                     | 0.91 (0.67, 1.25) | 1.05 (0.78, 1.43) | 0.67 (0.47, 0.96) | 0.51 (0.34, 0.77) | 0.0003             | 0.80 (0.69, 0.92)     |
| Flavonols         | Ref                     | 0.83 (0.61, 1.14) | 0.69 (0.49, 0.97) | 0.58 (0.40, 0.85) | 0.62 (0.41, 0.96) | 0.0355             | 0.92 (0.78, 1.09)     |
| Flavones          | Ref                     | 0.81 (0.60, 1.11) | 0.75 (0.54, 1.03) | 0.55 (0.38, 0.79) | 0.57 (0.38, 0.85) | 0.0029             | 0.82 (0.70, 0.96)     |
| Flavanones        | Ref                     | 0.74 (0.55, 1.00) | 0.57 (0.42, 0.79) | 0.58 (0.42, 0.81) | 0.58 (0.40, 0.82) | 0.0038             | 0.86 (0.74, 0.99)     |
| Flavan-3-ols      | Ref                     | 0.85 (0.62, 1.17) | 0.83 (0.60, 1.15) | 0.69 (0.48, 0.98) | 0.87 (0.61, 1.23) | 0.7719             | 0.96 (0.84, 1.09)     |
| TAC               | Ref                     | 0.82 (0.60, 1.12) | 0.86 (0.62, 1.19) | 0.51 (0.34, 0.75) | 0.57 (0.36, 0.89) | 0.0039             | 0.80 (0.67, 0.95)     |

The multivariable Cox proportional-hazards regression model was adjusted for age, body mass index (BMI), educational level, physical activity, drinking status, smoking status, and dietary fiber intake.

Total flavonoid intake was the sum of anthocyanidins, isoflavones, proanthocyanidins, flavonols, flavones, flavanones, and flavan-3-ols.

Total antioxidant capacity (TAC) was obtained by combining the individual antioxidant capacity of each antioxidant derived from every food item.

## STROBE Statement—checklist of items that should be included in reports of observational studies

|                           | Item No | Recommendation                                                                                                                                                                                                         | Page number |
|---------------------------|---------|------------------------------------------------------------------------------------------------------------------------------------------------------------------------------------------------------------------------|-------------|
| <b>Title and abstract</b> | 1       | (a) Indicate the study's design with a commonly used term in the title or the abstract                                                                                                                                 | Page 1      |
|                           |         | (b) Provide in the abstract an informative and balanced summary of what was done and what was found                                                                                                                    | Pages 2–3   |
| <b>Introduction</b>       |         |                                                                                                                                                                                                                        |             |
| Background/rationale      | 2       | Explain the scientific background and rationale for the investigation being reported                                                                                                                                   | Pages 4–5   |
| Objectives                | 3       | State specific objectives, including any prespecified hypotheses                                                                                                                                                       | Pages 5–6   |
| <b>Methods</b>            |         |                                                                                                                                                                                                                        |             |
| Study design              | 4       | Present key elements of study design early in the paper                                                                                                                                                                |             |
| Setting                   | 5       | Describe the setting, locations, and relevant dates, including periods of recruitment, exposure, follow-up, and data collection                                                                                        | Page 6      |
| Participants              | 6       | (a) <i>Cohort study</i> —Give the eligibility criteria, and the sources and methods of selection of participants. Describe methods of follow-up                                                                        | Pages 6–7   |
|                           |         | <i>Case-control study</i> —Give the eligibility criteria, and the sources and methods of case ascertainment and control selection. Give the rationale for the choice of cases and controls                             |             |
|                           |         | <i>Cross-sectional study</i> —Give the eligibility criteria, and the sources and methods of selection of participants                                                                                                  | Pages 6–7   |
|                           |         | (b) <i>Cohort study</i> —For matched studies, give matching criteria and number of exposed and unexposed<br><i>Case-control study</i> —For matched studies, give matching criteria and the number of controls per case |             |
| Variables                 | 7       | Clearly define all outcomes, exposures, predictors, potential confounders, and effect modifiers. Give diagnostic criteria, if applicable                                                                               | Pages 7–9   |
| Data sources/measurement  | 8*      | For each variable of interest, give sources of data and details of methods of assessment (measurement). Describe comparability of assessment methods if there is more than one group                                   | Pages 7–9   |
| Bias                      | 9       | Describe any efforts to address potential sources of bias                                                                                                                                                              | Pages 17–18 |
| Study size                | 10      | Explain how the study size was arrived at                                                                                                                                                                              | Pages 6–7   |
| Quantitative variables    | 11      | Explain how quantitative variables were handled in the analyses. If applicable, describe which groupings were chosen and why                                                                                           | Page 9      |
| Statistical methods       | 12      | (a) Describe all statistical methods, including those used to control for confounding                                                                                                                                  | Page 9      |
|                           |         | (b) Describe any methods used to examine subgroups and interactions                                                                                                                                                    |             |
|                           |         | (c) Explain how missing data were addressed                                                                                                                                                                            |             |
|                           |         | (d) <i>Cohort study</i> —If applicable, explain how loss to follow-up was addressed<br><i>Case-control study</i> —If applicable, explain how matching of cases and controls was addressed                              |             |



*Cross-sectional study*—If applicable, describe analytical methods taking account of sampling strategy

(e) Describe any sensitivity analyses

| <b>Results</b>           |     |                                                                                                                                                                                                                                                                                                                                                                                                               |             |
|--------------------------|-----|---------------------------------------------------------------------------------------------------------------------------------------------------------------------------------------------------------------------------------------------------------------------------------------------------------------------------------------------------------------------------------------------------------------|-------------|
| Participants             | 13* | (a) Report numbers of individuals at each stage of study—eg numbers potentially eligible, examined for eligibility, confirmed eligible, included in the study, completing follow-up, and analysed<br>(b) Give reasons for non-participation at each stage<br>(c) Consider use of a flow diagram                                                                                                               | Pages 10–14 |
| Descriptive data         | 14* | (a) Give characteristics of study participants (eg demographic, clinical, social) and information on exposures and potential confounders<br>(b) Indicate number of participants with missing data for each variable of interest<br>(c) <i>Cohort study</i> —Summarise follow-up time (eg, average and total amount)                                                                                           | Pages 10–12 |
| Outcome data             | 15* | <i>Cohort study</i> —Report numbers of outcome events or summary measures over time<br><i>Case-control study</i> —Report numbers in each exposure category, or summary measures of exposure<br><i>Cross-sectional study</i> —Report numbers of outcome events or summary measures                                                                                                                             | Page 11     |
| Main results             | 16  | (a) Give unadjusted estimates and, if applicable, confounder-adjusted estimates and their precision (eg, 95% confidence interval). Make clear which confounders were adjusted for and why they were included<br>(b) Report category boundaries when continuous variables were categorized<br>(c) If relevant, consider translating estimates of relative risk into absolute risk for a meaningful time period | Pages 12–13 |
| Other analyses           | 17  | Report other analyses done—eg analyses of subgroups and interactions, and sensitivity analyses                                                                                                                                                                                                                                                                                                                | Page 14     |
| <b>Discussion</b>        |     |                                                                                                                                                                                                                                                                                                                                                                                                               |             |
| Key results              | 18  | Summarise key results with reference to study objectives                                                                                                                                                                                                                                                                                                                                                      | Page 14     |
| Limitations              | 19  | Discuss limitations of the study, taking into account sources of potential bias or imprecision. Discuss both direction and magnitude of any potential bias                                                                                                                                                                                                                                                    | Pages 17–18 |
| Interpretation           | 20  | Give a cautious overall interpretation of results considering objectives, limitations, multiplicity of analyses, results from similar studies, and other relevant evidence                                                                                                                                                                                                                                    | Pages 14–17 |
| Generalisability         | 21  | Discuss the generalisability (external validity) of the study results                                                                                                                                                                                                                                                                                                                                         | Page 18     |
| <b>Other information</b> |     |                                                                                                                                                                                                                                                                                                                                                                                                               |             |
| Funding                  | 22  | Give the source of funding and the role of the funders for the present study and, if applicable, for the original study on which the present article is based                                                                                                                                                                                                                                                 | Page 19     |

\*Give information separately for cases and controls in case-control studies and, if applicable, for exposed and unexposed groups in cohort and cross-sectional studies.

**Note:** An Explanation and Elaboration article discusses each checklist item and gives methodological background and published examples of transparent reporting. The STROBE checklist is best used in conjunction with this article (freely available on the Web sites of PLoS Medicine at <http://www.plosmedicine.org/>, Annals of Internal Medicine at <http://www.annals.org/>, and Epidemiology at <http://www.epidem.com/>). Information on the STROBE Initiative is available at [www.strobe-statement.org](http://www.strobe-statement.org).
