# Supplementary material for: Dietary antioxidant consumption and the risk of type 2 diabetes in South Korean adults: a prospective cohort study based on the Health Examinees study
Source: PubMed Central journal article supplement — BMJ Open. 2022 Jul 12;12(7):e065073. doi: 10.1136/bmjopen-2022-065073 (PMC9277397; doi:10.1136/bmjopen-2022-065073), 2022-07-12
Supplement: bmjopen-2022-065073supp001.pdf [file bmjopen-2022-065073supp001.pdf]

**Table S1. Hazard ratios of type 2 diabetes during follow-up according to quintile of cumulative average antioxidant consumption in model 2**

|                   | Antioxidant consumption |                   |                   |                   |                   | <i>P</i> for trend | HR for a SD increment |
|-------------------|-------------------------|-------------------|-------------------|-------------------|-------------------|--------------------|-----------------------|
|                   | Q1                      | Q2                | Q3                | Q4                | Q5                |                    |                       |
| <b>Men</b>        |                         |                   |                   |                   |                   |                    |                       |
| Total flavonoid   | Ref                     | 0.97 (0.71, 1.34) | 0.89 (0.63, 1.25) | 0.89 (0.64, 1.24) | 0.62 (0.42, 0.92) | 0.0136             | 0.85 (0.75, 0.97)     |
| Anthocyanidins    | Ref                     | 0.78 (0.56, 1.10) | 0.98 (0.71, 1.35) | 0.85 (0.61, 1.19) | 0.70 (0.49, 1.01) | 0.0994             | 0.87 (0.76, 0.99)     |
| Isoflavones       | Ref                     | 1.44 (1.01, 2.04) | 1.10 (0.76, 1.59) | 1.18 (0.81, 1.70) | 1.32 (0.90, 1.95) | 0.4245             | 1.04 (0.92, 1.17)     |
| Proanthocyanidins | Ref                     | 1.04 (0.76, 1.44) | 0.97 (0.70, 1.36) | 0.77 (0.54, 1.09) | 0.72 (0.50, 1.04) | 0.0226             | 0.87 (0.77, 0.99)     |
| Flavanols         | Ref                     | 1.46 (1.06, 2.00) | 0.88 (0.61, 1.27) | 0.93 (0.64, 1.33) | 0.77 (0.52, 1.14) | 0.0218             | 0.82 (0.71, 0.95)     |
| Flavones          | Ref                     | 1.00 (0.72, 1.38) | 1.00 (0.71, 1.40) | 0.82 (0.57, 1.17) | 0.83 (0.57, 1.21) | 0.1941             | 0.89 (0.79, 1.01)     |
| Flavanones        | Ref                     | 0.83 (0.59, 1.17) | 1.21 (0.88, 1.67) | 0.93 (0.66, 1.30) | 0.81 (0.56, 1.16) | 0.2998             | 0.93 (0.83, 1.05)     |
| Flavan-3-ols      | Ref                     | 0.88 (0.63, 1.23) | 1.11 (0.80, 1.54) | 0.78 (0.55, 1.11) | 0.74 (0.51, 1.08) | 0.0719             | 0.89 (0.79, 1.01)     |
| TAC               | Ref                     | 1.07 (0.77, 1.47) | 0.94 (0.67, 1.31) | 0.85 (0.59, 1.20) | 0.71 (0.48, 1.05) | 0.0347             | 0.84 (0.74, 0.96)     |
| <b>Women</b>      |                         |                   |                   |                   |                   |                    |                       |
| Total flavonoid   | Ref                     | 0.92 (0.68, 1.24) | 0.84 (0.62, 1.15) | 0.63 (0.45, 0.89) | 0.55 (0.38, 0.80) | 0.0002             | 0.80 (0.71, 0.91)     |
| Anthocyanidins    | Ref                     | 0.92 (0.68, 1.24) | 0.64 (0.46, 0.89) | 0.72 (0.52, 1.00) | 0.56 (0.39, 0.80) | 0.0007             | 0.86 (0.75, 0.97)     |
| Isoflavones       | Ref                     | 0.99 (0.72, 1.35) | 0.72 (0.51, 1.02) | 0.84 (0.60, 1.17) | 0.83 (0.58, 1.18) | 0.2885             | 0.94 (0.84, 1.07)     |
| Proanthocyanidins | Ref                     | 0.92 (0.67, 1.25) | 1.07 (0.79, 1.45) | 0.67 (0.48, 0.95) | 0.51 (0.35, 0.74) | <.0001             | 0.79 (0.70, 0.90)     |
| Flavanols         | Ref                     | 0.85 (0.62, 1.15) | 0.69 (0.50, 0.96) | 0.59 (0.42, 0.83) | 0.62 (0.44, 0.89) | 0.0066             | 0.89 (0.78, 1.02)     |
| Flavones          | Ref                     | 0.82 (0.60, 1.11) | 0.75 (0.55, 1.03) | 0.54 (0.38, 0.77) | 0.57 (0.40, 0.81) | 0.0004             | 0.82 (0.71, 0.93)     |
| Flavanones        | Ref                     | 0.74 (0.55, 1.00) | 0.57 (0.41, 0.79) | 0.58 (0.42, 0.80) | 0.55 (0.40, 0.77) | 0.0008             | 0.84 (0.73, 0.96)     |
| Flavan-3-ols      | Ref                     | 0.84 (0.62, 1.15) | 0.81 (0.59, 1.12) | 0.66 (0.47, 0.92) | 0.81 (0.58, 1.13) | 0.4157             | 0.93 (0.82, 1.06)     |
| TAC               | Ref                     | 0.84 (0.62, 1.14) | 0.89 (0.65, 1.21) | 0.53 (0.37, 0.75) | 0.60 (0.42, 0.86) | 0.0007             | 0.81 (0.71, 0.93)     |

The multivariable Cox proportional-hazards regression model was adjusted for age, body mass index (BMI), educational level, physical activity, alcohol consumption, smoking status, total energy intake, energy percent from carbohydrate, energy percent from protein, and energy percent from fat.

Total flavonoid intake was the sum of anthocyanidins, isoflavones, proanthocyanidins, flavanols, flavones, flavanones, and flavan-3-ols.

Total antioxidant capacity (TAC) was obtained by combining the individual antioxidant capacity of each antioxidant derived from every food item.

**Table S2. Hazard ratios of type 2 diabetes during follow-up according to quintile of cumulative average antioxidant consumption in model 3**

|                   | Antioxidant consumption |                   |                   |                   |                   | <i>P</i> for trend | HR for a SD increment |
|-------------------|-------------------------|-------------------|-------------------|-------------------|-------------------|--------------------|-----------------------|
|                   | Q1                      | Q2                | Q3                | Q4                | Q5                |                    |                       |
| <b>Men</b>        |                         |                   |                   |                   |                   |                    |                       |
| Total flavonoid   | Ref                     | 1.00 (0.72, 1.39) | 0.94 (0.66, 1.34) | 0.98 (0.68, 1.40) | 0.71 (0.45, 1.13) | 0.1553             | 0.89 (0.76, 1.04)     |
| Anthocyanidins    | Ref                     | 0.82 (0.58, 1.15) | 1.06 (0.76, 1.47) | 0.96 (0.67, 1.37) | 0.85 (0.56, 1.30) | 0.6471             | 0.92 (0.79, 1.08)     |
| Isoflavones       | Ref                     | 1.53 (1.08, 2.18) | 1.22 (0.84, 1.76) | 1.31 (0.90, 1.89) | 1.61 (1.09, 2.38) | 0.0731             | 1.12 (0.99, 1.26)     |
| Proanthocyanidins | Ref                     | 1.06 (0.77, 1.46) | 1.02 (0.72, 1.43) | 0.83 (0.58, 1.20) | 0.81 (0.54, 1.22) | 0.1640             | 0.92 (0.79, 1.06)     |
| Flavonols         | Ref                     | 1.54 (1.12, 2.13) | 0.96 (0.66, 1.39) | 1.05 (0.72, 1.54) | 0.97 (0.62, 1.52) | 0.3271             | 0.88 (0.74, 1.05)     |
| Flavones          | Ref                     | 1.06 (0.76, 1.48) | 1.09 (0.77, 1.54) | 0.95 (0.65, 1.38) | 1.07 (0.69, 1.65) | 0.9493             | 0.96 (0.83, 1.11)     |
| Flavanones        | Ref                     | 0.85 (0.61, 1.21) | 1.29 (0.94, 1.79) | 1.03 (0.73, 1.47) | 0.95 (0.64, 1.40) | 0.8985             | 0.98 (0.87, 1.11)     |
| Flavan-3-ols      | Ref                     | 0.93 (0.66, 1.29) | 1.19 (0.86, 1.66) | 0.85 (0.59, 1.23) | 0.84 (0.57, 1.23) | 0.2206             | 0.92 (0.81, 1.05)     |
| TAC               | Ref                     | 1.13 (0.81, 1.57) | 1.02 (0.71, 1.45) | 0.98 (0.67, 1.44) | 0.88 (0.55, 1.40) | 0.3967             | 0.88 (0.75, 1.04)     |
| <b>Women</b>      |                         |                   |                   |                   |                   |                    |                       |
| Total flavonoid   | Ref                     | 0.90 (0.66, 1.23) | 0.82 (0.59, 1.13) | 0.62 (0.43, 0.89) | 0.54 (0.35, 0.83) | 0.0015             | 0.79 (0.68, 0.93)     |
| Anthocyanidins    | Ref                     | 0.93 (0.69, 1.25) | 0.64 (0.46, 0.90) | 0.73 (0.52, 1.04) | 0.58 (0.39, 0.86) | 0.0054             | 0.88 (0.77, 1.02)     |
| Isoflavones       | Ref                     | 1.01 (0.74, 1.39) | 0.75 (0.53, 1.06) | 0.88 (0.63, 1.23) | 0.89 (0.62, 1.27) | 0.4969             | 0.97 (0.86, 1.10)     |
| Proanthocyanidins | Ref                     | 0.91 (0.67, 1.25) | 1.05 (0.78, 1.43) | 0.67 (0.47, 0.96) | 0.51 (0.34, 0.77) | 0.0003             | 0.80 (0.69, 0.92)     |
| Flavonols         | Ref                     | 0.83 (0.61, 1.14) | 0.69 (0.49, 0.97) | 0.58 (0.40, 0.85) | 0.62 (0.41, 0.96) | 0.0355             | 0.92 (0.78, 1.09)     |
| Flavones          | Ref                     | 0.81 (0.60, 1.11) | 0.75 (0.54, 1.03) | 0.55 (0.38, 0.79) | 0.57 (0.38, 0.85) | 0.0029             | 0.82 (0.70, 0.96)     |
| Flavanones        | Ref                     | 0.74 (0.55, 1.00) | 0.57 (0.42, 0.79) | 0.58 (0.42, 0.81) | 0.58 (0.40, 0.82) | 0.0038             | 0.86 (0.74, 0.99)     |
| Flavan-3-ols      | Ref                     | 0.85 (0.62, 1.17) | 0.83 (0.60, 1.15) | 0.69 (0.48, 0.98) | 0.87 (0.61, 1.23) | 0.7719             | 0.96 (0.84, 1.09)     |
| TAC               | Ref                     | 0.82 (0.60, 1.12) | 0.86 (0.62, 1.19) | 0.51 (0.34, 0.75) | 0.57 (0.36, 0.89) | 0.0039             | 0.80 (0.67, 0.95)     |

The multivariable Cox proportional-hazards regression model was adjusted for age, body mass index (BMI), educational level, physical activity, drinking status, smoking status, and dietary fiber intake.

Total flavonoid intake was the sum of anthocyanidins, isoflavones, proanthocyanidins, flavonols, flavones, flavanones, and flavan-3-ols.

Total antioxidant capacity (TAC) was obtained by combining the individual antioxidant capacity of each antioxidant derived from every food item.
